# Supplementary material for: Aging: a portrait from gene expression profile in blood cells
Source: PubMed Central journal article supplement (PMC5032697; doi:10.18632/aging.101016), 2016-08-19
Supplement: aging-08-1802-s001.pdf [file aging-08-1802-s001.pdf]

## SUPPLEMENTARY DATA

Data of Supplementary Table S1 is presented in Full Text version of this manuscript.

**Table S1.** Genes that differed between Elderly - negative Fold Change (FC), and Adults - positive FC ( $p < 0.05$ ).

**Supplementary Table S2.** Classification of differentially expressed genes ( $p$ -value  $< 0.05$ ) according to Panther Biological Processes in DAVID

| Biological Process                       | Genes counted | p.value <sup>a</sup> |
|------------------------------------------|---------------|----------------------|
| <i>Elderly</i>                           |               |                      |
| Immunity and defense                     | 58            | 8.7E-06              |
| Hematopoiesis                            | 7             | 9.0E-03              |
| Lipid, fatty acid and steroid metabolism | 30            | 1.1E-02              |
| Blood clotting                           | 7             | 2.6E-02              |
| Detoxification                           | 6             | 2.8E-02              |
| B-cell- and antibody-mediated immunity   | 7             | 3.0E-02              |
| Protein phosphorylation                  | 25            | 3.1E-02              |
| Lipid metabolism                         | 9             | 3.3E-02              |
| Intracellular signaling cascade          | 31            | 4.1E-02              |
|                                          |               |                      |
| <i>Adults</i>                            |               |                      |
| Protein biosynthesis                     | 18            | 3.4E-03              |
| Protein folding                          | 9             | 1.3E-02              |
| Hearing                                  | 4             | 2.0E-02              |
| Pre-mRNA processing                      | 11            | 3.2E-02              |
| Ectoderm development                     | 21            | 3.4E-02              |

<sup>a</sup> by Fisher's exact test.

**Supplementary Table S3.** GSEA analysis of pathways positively and negatively associated with VO<sub>2max</sub>

| NAME                                           | Category                                                                                                         | NES  | FDR<br>(q-val <0.05) |
|------------------------------------------------|------------------------------------------------------------------------------------------------------------------|------|----------------------|
| <i>VO<sub>2max</sub> positively correlated</i> |                                                                                                                  |      |                      |
| BIOCARTA                                       | TCRA PATHWAY                                                                                                     | 2.01 | 0.017                |
| REACTOME                                       | TRANSLATION                                                                                                      | 2.31 | 0.001                |
|                                                | SRP DEPENDENT COTRANSLATIONAL PROTEIN TARGETING TO MEMBRANE                                                      | 2.25 | 0.001                |
|                                                | 3 UTR MEDIATED TRANSLATIONAL REGULATION                                                                          | 2.17 | 0.002                |
|                                                | RESPIRATORY ELECTRON TRANSPORT ATP SYNTHESIS BY CHEMIOSMOTIC COUPLING AND HEAT PRODUCTION BY UNCOUPLING PROTEINS | 2.08 | 0.004                |
|                                                | RESPIRATORY ELECTRON TRANSPORT                                                                                   | 2.06 | 0.004                |
|                                                | INFLUENZA VIRAL RNA TRANSCRIPTION AND REPLICATION                                                                | 2.03 | 0.006                |
|                                                | PEPTIDE CHAIN ELONGATION                                                                                         | 2.02 | 0.006                |
|                                                | INFLUENZA LIFE CYCLE                                                                                             | 2.00 | 0.006                |
|                                                | PURINE RIBONUCLEOSIDE MONOPHOSPHATE BIOSYNTHESIS                                                                 | 1.89 | 0.031                |
|                                                | TRANSLOCATION OF ZAP 70 TO IMMUNOLOGICAL SYNAPSE                                                                 | 1.86 | 0.036                |
|                                                | FORMATION OF THE TERNARY COMPLEX AND SUBSEQUENTLY THE 43S COMPLEX                                                | 1.86 | 0.033                |
|                                                | NONSENSE MEDIATED DECAY ENHANCED BY THE EXON JUNCTION COMPLEX                                                    | 1.84 | 0.038                |
|                                                | SYNTHESIS SECRETION AND INACTIVATION OF GLP1                                                                     | 1.84 | 0.036                |
|                                                | ACTIVATION OF THE MRNA UPON BINDING OF THE CAP BINDING COMPLEX AND EIFS AND SUBSEQUENT BINDING TO 43S            | 1.83 | 0.037                |
|                                                | RNA POL III TRANSCRIPTION INITIATION FROM TYPE 2 PROMOTER                                                        | 1.82 | 0.040                |
|                                                | TRNA AMINOACYLATION                                                                                              | 1.80 | 0.046                |
|                                                | MITOCHONDRIAL TRNA AMINOACYLATION                                                                                | 1.80 | 0.046                |
|                                                | ACETYLCHOLINE NEUROTRANSMITTER RELEASE CYCLE                                                                     | 1.80 | 0.044                |

**Supplementary Table S3**continue

|                                                |                                                                              |       |       |
|------------------------------------------------|------------------------------------------------------------------------------|-------|-------|
| <i>VO<sub>2</sub>max negatively correlated</i> |                                                                              |       |       |
|                                                | BIOCARTA                                                                     |       |       |
|                                                | VDR PATHWAY                                                                  | -2.16 | 0.018 |
|                                                | UCALPAIN PATHWAY                                                             | -2.00 | 0.025 |
|                                                | RHO PATHWAY                                                                  | -2.01 | 0.031 |
|                                                | INTEGRIN PATHWAY                                                             | -2.06 | 0.034 |
|                                                | AHSP PATHWAY                                                                 | -1.93 | 0.036 |
|                                                | CELL2CELL PATHWAY                                                            | -2.01 | 0.038 |
|                                                | MET PATHWAY                                                                  | -1.94 | 0.038 |
| REACTOME                                       |                                                                              |       |       |
|                                                | RESPONSE TO ELEVATED PLATELET CYTOSOLIC CA <sub>2</sub>                      | -2.25 | 0.008 |
|                                                | PLATELET ACTIVATION SIGNALING AND AGGREGATION                                | -2.15 | 0.014 |
|                                                | TOLL RECEPTOR CASCADES                                                       | -2.13 | 0.013 |
|                                                | SPRY REGULATION OF FGF SIGNALING                                             | -2.10 | 0.015 |
|                                                | INFLAMMASOMES                                                                | -2.06 | 0.019 |
|                                                | SMOOTH MUSCLE CONTRACTION                                                    | -2.04 | 0.020 |
|                                                | EGFR DOWNREGULATION                                                          | -2.03 | 0.020 |
|                                                | MYD88 MAL CASCADE INITIATED ON PLASMA MEMBRANE                               | -2.02 | 0.020 |
|                                                | ADVANCED GLYCOSYLATION ENDPRODUCT RECEPTOR SIGNALING                         | -2.02 | 0.018 |
|                                                | HEMOSTASIS                                                                   | -2.01 | 0.017 |
|                                                | SIGNALING BY SCF KIT                                                         | -1.96 | 0.026 |
|                                                | IRON UPTAKE AND TRANSPORT                                                    | -1.91 | 0.044 |
|                                                | ACTIVATED TLR4 SIGNALLING                                                    | -1.89 | 0.046 |
|                                                | TRAF6 MEDIATED INDUCTION OF NFKB AND MAP KINASES UPON TLR7 8 OR 9 ACTIVATION | -1.89 | 0.044 |

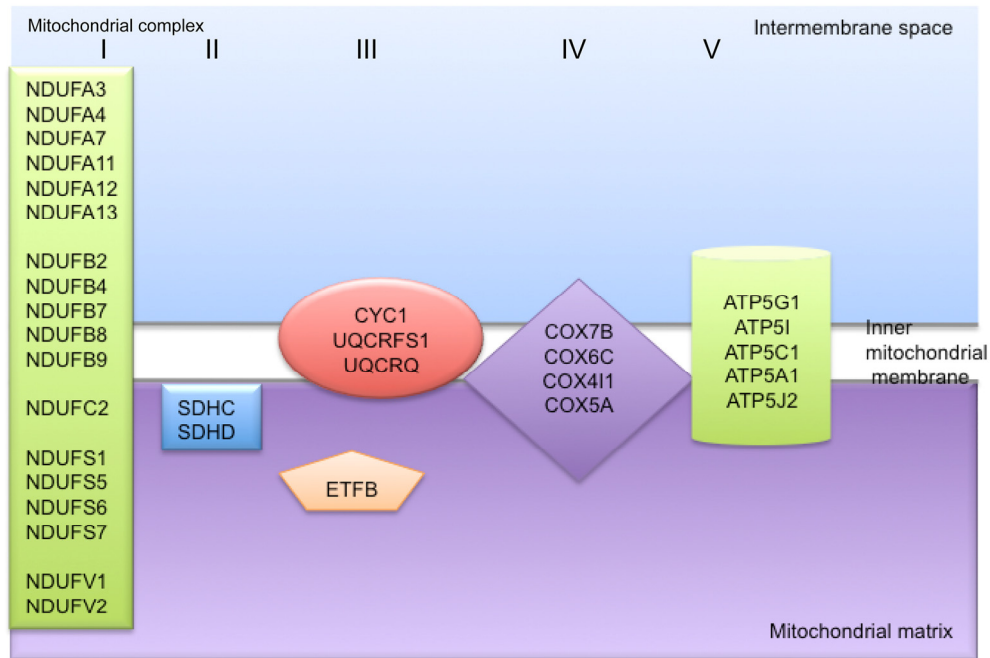

Supplementary Figure S1. Schematic representation of gene coding for subunits of mitochondrial oxidative phosphorylation complexes that resulted under-represented in the blood samples from the Elderly group.
