# Supplementary material for: Aging: a portrait from gene expression profile in blood cells
Source: publisher site journal article supplement (doi:10.18632/aging.101016), 2016-08-19
Supplement: Supplementary file 1 [file aging-v8i8-101016-supplementary-material-SD2.docx]

**Table S1**. Genes that differed between Elderly - *negative Fold Change (FC)*, and Adults - *positive FC* (p < 0.05).

*Genes up-regulated in the Elderly*

| Gene Id | Gene Symbol | Gene Description | Entrez Id | P-value | Fold Change |
| --- | --- | --- | --- | --- | --- |
| 2944_at | GSTM1 | glutathione S-transferase mu 1 | 2944 | 0.0297 | -3.35 |
| 340206_at | TREML3P | triggering receptor expressed on myeloid cells-like 3, pseudogene | 340206 | 0.0015 | -2.19 |
| 374969_at | CCDC23 | coiled-coil domain containing 23 | 374969 | 0.001 | -2.14 |
| 5004_at | ORM1 | orosomucoid 1 | 5004 | 0.0089 | -1.95 |
| 10321_at | CRISP3 | cysteine-rich secretory protein 3 | 10321 | 0.0389 | -1.78 |
| 677806_at | SNORA20 | small nucleolar RNA, H/ACA box 20 | 677806 | 0.0284 | -1.78 |
| 116369_at | SLC26A8 | solute carrier family 26, member 8 | 116369 | 0.0028 | -1.76 |
| 285852_at | TREML4 | triggering receptor expressed on myeloid cells-like 4 | 285852 | 0.0364 | -1.76 |
| 306_at | ANXA3 | annexin A3 | 306 | 0.0132 | -1.76 |
| 54682_at | MANSC1 | MANSC domain containing 1 | 54682 | 0.0156 | -1.73 |
| 6403_at | SELP | selectin P (granule membrane protein 140kDa, antigen CD62) | 6403 | 0.0015 | -1.7 |
| 10638_at | SPHAR | S-phase response (cyclin related) | 10638 | 0.0113 | -1.68 |
| 4318_at | MMP9 | matrix metallopeptidase 9 (gelatinase B, 92kDa gelatinase, 92kDa type IV collagenase) | 4318 | 0.0015 | -1.66 |
| 4835_at | NQO2 | NAD(P)H dehydrogenase, quinone 2 | 4835 | 0.0007 | -1.65 |
| 249_at | ALPL | alkaline phosphatase, liver/bone/kidney | 249 | 0.0209 | -1.64 |
| 83999_at | KREMEN1 | kringle containing transmembrane protein 1 | 83999 | 0.0061 | -1.61 |
| 10434_at | LYPLA1 | lysophospholipase I | 10434 | 0.0307 | -1.61 |
| 4671_at | NAIP | NLR family, apoptosis inhibitory protein | 4671 | 0.0185 | -1.58 |
| 100132288_at | TEKT4P2 | tektin 4 pseudogene 2 | 100132288 | 0.0094 | -1.56 |
| 383_at | ARG1 | arginase, liver | 383 | 0.0021 | -1.54 |
| 4311_at | MME | membrane metallo-endopeptidase | 4311 | 0.0063 | -1.53 |
| 116173_at | CMTM5 | CKLF-like MARVEL transmembrane domain containing 5 | 116173 | 0.0076 | -1.52 |
| 8972_at | MGAM | maltase-glucoamylase (alpha-glucosidase) | 8972 | 0.0031 | -1.52 |
| 2949_at | GSTM5 | glutathione S-transferase mu 5 | 2949 | 0.0064 | -1.52 |
| 2204_at | FCAR | Fc fragment of IgA, receptor for | 2204 | 0.003 | -1.51 |
| 58191_at | CXCL16 | chemokine (C-X-C motif) ligand 16 | 58191 | 0.0005 | -1.51 |
| 284486_at | THEM5 | thioesterase superfamily member 5 | 284486 | 0.0027 | -1.5 |
| 25797_at | QPCT | glutaminyl-peptide cyclotransferase | 25797 | 0.0026 | -1.5 |
| 3674_at | ITGA2B | integrin, alpha 2b (platelet glycoprotein IIb of IIb/IIIa complex, antigen CD41) | 3674 | 0.015 | -1.49 |
| 54741_at | LEPROT | leptin receptor overlapping transcript | 54741 | 0.0481 | -1.49 |
| 22885_at | ABLIM3 | actin binding LIM protein family, member 3 | 22885 | 0.0074 | -1.49 |
| 10217_at | CTDSPL | CTD (carboxy-terminal domain, RNA polymerase II, polypeptide A) small phosphatase-like | 10217 | 0.0179 | -1.48 |
| 79865_at | TREML2 | triggering receptor expressed on myeloid cells-like 2 | 79865 | 0.0051 | -1.48 |
| 11240_at | PADI2 | peptidyl arginine deiminase, type II | 11240 | 0.0226 | -1.48 |
| 340205_at | TREML1 | triggering receptor expressed on myeloid cells-like 1 | 340205 | 0.0052 | -1.48 |
| 2952_at | GSTT1 | glutathione S-transferase theta 1 | 2952 | 0.0432 | -1.46 |
| 120224_at | TMEM45B | transmembrane protein 45B | 120224 | 0.0417 | -1.44 |
| 9537_at | TP53I11 | tumor protein p53 inducible protein 11 | 9537 | 0.0001 | -1.44 |
| 80228_at | ORAI2 | ORAI calcium release-activated calcium modulator 2 | 80228 | 0.0012 | -1.43 |
| 10257_at | ABCC4 | ATP-binding cassette, sub-family C (CFTR/MRP), member 4 | 10257 | 0.0102 | -1.43 |
| 79739_at | TTLL7 | tubulin tyrosine ligase-like family, member 7 | 79739 | 0.0125 | -1.43 |
| 25824_at | PRDX5 | peroxiredoxin 5 | 25824 | 0.036 | -1.43 |
| 654_at | BMP6 | bone morphogenetic protein 6 | 654 | 0.0006 | -1.42 |
| 222487_at | GPR97 | G protein-coupled receptor 97 | 222487 | 0.004 | -1.42 |
| 388931_at | MFSD2B | major facilitator superfamily domain containing 2B | 388931 | 0.0105 | -1.42 |
| 5266_at | PI3 | peptidase inhibitor 3, skin-derived | 5266 | 0.049 | -1.42 |
| 80739_at | C6orf25 | chromosome 6 open reading frame 25 | 80739 | 0.0024 | -1.42 |
| 3772_at | KCNJ15 | potassium inwardly-rectifying channel, subfamily J, member 15 | 3772 | 0.0442 | -1.41 |
| 79971_at | WLS | wntless homolog (Drosophila) | 79971 | 0.036 | -1.41 |
| 9886_at | RHOBTB1 | Rho-related BTB domain containing 1 | 9886 | 0.0027 | -1.4 |
| 660_at | BMX | BMX non-receptor tyrosine kinase | 660 | 0.0013 | -1.4 |
| 60675_at | PROK2 | prokineticin 2 | 60675 | 0.0068 | -1.4 |
| 2162_at | F13A1 | coagulation factor XIII, A1 polypeptide | 2162 | 0.0183 | -1.39 |
| 84002_at | B3GNT5 | UDP-GlcNAc:betaGal beta-1,3-N-acetylglucosaminyltransferase 5 | 84002 | 0.0187 | -1.39 |
| 140809_at | SRXN1 | sulfiredoxin 1 | 140809 | 0.0208 | -1.39 |
| 286527_at | TMSB15B | thymosin beta 15B | 286527 | 0.0095 | -1.39 |
| 8291_at | DYSF | dysferlin, limb girdle muscular dystrophy 2B (autosomal recessive) | 8291 | 0.0038 | -1.38 |
| 200879_at | LIPH | lipase, member H | 200879 | 0.0233 | -1.38 |
| 79689_at | STEAP4 | STEAP family member 4 | 79689 | 0.0345 | -1.38 |
| 25801_at | GCA | grancalcin, EF-hand calcium binding protein | 25801 | 0.0359 | -1.37 |
| 56952_at | PRTFDC1 | phosphoribosyl transferase domain containing 1 | 56952 | 0.0225 | -1.37 |
| 4929_at | NR4A2 | nuclear receptor subfamily 4, group A, member 2 | 4929 | 0.0001 | -1.37 |
| 56670_at | SUCNR1 | succinate receptor 1 | 56670 | 0.0106 | -1.37 |
| 1024_at | CDK8 | cyclin-dependent kinase 8 | 1024 | 0.0401 | -1.37 |
| 2180_at | ACSL1 | acyl-CoA synthetase long-chain family member 1 | 2180 | 0.0107 | -1.37 |
| 29774_at | POM121L9P | POM121 transmembrane nucleoporin-like 9, pseudogene | 29774 | 0.0222 | -1.36 |
| 90952_at | ESAM | endothelial cell adhesion molecule | 90952 | 0.017 | -1.36 |
| 387590_at | TPTEP1 | transmembrane phosphatase with tensin homology pseudogene 1 | 387590 | 0.0416 | -1.36 |
| 6583_at | SLC22A4 | solute carrier family 22 (organic cation/ergothioneine transporter), member 4 | 6583 | 0.0152 | -1.36 |
| 19_at | ABCA1 | ATP-binding cassette, sub-family A (ABC1), member 1 | 19 | 0.031 | -1.36 |
| 23052_at | ENDOD1 | endonuclease domain containing 1 | 23052 | 0.0056 | -1.36 |
| 29126_at | CD274 | CD274 molecule | 29126 | 0.0369 | -1.36 |
| 5139_at | PDE3A | phosphodiesterase 3A, cGMP-inhibited | 5139 | 0.0234 | -1.36 |
| 84337_at | ELOF1 | elongation factor 1 homolog (S. cerevisiae) | 84337 | 0.0135 | -1.35 |
| 23569_at | PADI4 | peptidyl arginine deiminase, type IV | 23569 | 0.0067 | -1.35 |
| 597_at | BCL2A1 | BCL2-related protein A1 | 597 | 0.0159 | -1.35 |
| 64386_at | MMP25 | matrix metallopeptidase 25 | 64386 | 0.0138 | -1.35 |
| 100533464_at | PRH1-PRR4 | PRH1-PRR4 readthrough | 100533464 | 0.0407 | -1.35 |
| 1191_at | CLU | clusterin | 1191 | 0.0108 | -1.34 |
| 84886_at | C1orf198 | chromosome 1 open reading frame 198 | 84886 | 0.0083 | -1.34 |
| 83699_at | SH3BGRL2 | SH3 domain binding glutamic acid-rich protein like 2 | 83699 | 0.0492 | -1.34 |
| 100288637_at | LOC100288637 | OTU domain containing 7A pseudogene | 100288637 | 0.0472 | -1.34 |
| 8804_at | CREG1 | cellular repressor of E1A-stimulated genes 1 | 8804 | 0.0421 | -1.34 |
| 84649_at | DGAT2 | diacylglycerol O-acyltransferase 2 | 84649 | 0.0029 | -1.34 |
| 10877_at | CFHR4 | complement factor H-related 4 | 10877 | 0.027 | -1.34 |
| 5239_at | PGM5 | phosphoglucomutase 5 | 5239 | 0.0298 | -1.34 |
| 6915_at | TBXA2R | thromboxane A2 receptor | 6915 | 0.0038 | -1.34 |
| 8825_at | LIN7A | lin-7 homolog A (C. elegans) | 8825 | 0.0273 | -1.34 |
| 342372_at | PKD1L3 | polycystic kidney disease 1-like 3 | 342372 | 0.0076 | -1.33 |
| 347404_at | LANCL3 | LanC lantibiotic synthetase component C-like 3 (bacterial) | 347404 | 0.0212 | -1.33 |
| 340348_at | TSPAN33 | tetraspanin 33 | 340348 | 0.0075 | -1.33 |
| 79993_at | ELOVL7 | ELOVL fatty acid elongase 7 | 79993 | 0.0497 | -1.33 |
| 8993_at | PGLYRP1 | peptidoglycan recognition protein 1 | 8993 | 0.001 | -1.33 |
| 116496_at | FAM129A | family with sequence similarity 129, member A | 116496 | 0.0248 | -1.33 |
| 4051_at | CYP4F3 | cytochrome P450, family 4, subfamily F, polypeptide 3 | 4051 | 0.009 | -1.32 |
| 3693_at | ITGB5 | integrin, beta 5 | 3693 | 0.0153 | -1.32 |
| 143686_at | SESN3 | sestrin 3 | 143686 | 0.0021 | -1.32 |
| 1241_at | LTB4R | leukotriene B4 receptor | 1241 | 0.0027 | -1.32 |
| 9414_at | TJP2 | tight junction protein 2 | 9414 | 0.0001 | -1.32 |
| 8875_at | VNN2 | vanin 2 | 8875 | 0.0139 | -1.32 |
| 222235_at | FBXL13 | F-box and leucine-rich repeat protein 13 | 222235 | 0.0488 | -1.32 |
| 10857_at | PGRMC1 | progesterone receptor membrane component 1 | 10857 | 0.0453 | -1.31 |
| 7035_at | TFPI | tissue factor pathway inhibitor (lipoprotein-associated coagulation inhibitor) | 7035 | 0.0054 | -1.31 |
| 80325_at | ABTB1 | ankyrin repeat and BTB (POZ) domain containing 1 | 80325 | 0.0153 | -1.31 |
| 2495_at | FTH1 | ferritin, heavy polypeptide 1 | 2495 | 0.0005 | -1.31 |
| 220164_at | DOK6 | docking protein 6 | 220164 | 0.0044 | -1.31 |
| 2549_at | GAB1 | GRB2-associated binding protein 1 | 2549 | 0.0414 | -1.31 |
| 22924_at | MAPRE3 | microtubule-associated protein, RP/EB family, member 3 | 22924 | 0.0171 | -1.31 |
| 1183_at | CLCN4 | chloride channel, voltage-sensitive 4 | 1183 | 0.0379 | -1.31 |
| 10333_at | TLR6 | toll-like receptor 6 | 10333 | 0.0443 | -1.31 |
| 6678_at | SPARC | secreted protein, acidic, cysteine-rich (osteonectin) | 6678 | 0.0166 | -1.31 |
| 2982_at | GUCY1A3 | guanylate cyclase 1, soluble, alpha 3 | 2982 | 0.0474 | -1.31 |
| 4052_at | LTBP1 | latent transforming growth factor beta binding protein 1 | 4052 | 0.0347 | -1.3 |
| 51571_at | FAM49B | family with sequence similarity 49, member B | 51571 | 0.0094 | -1.3 |
| 377677_at | CA13 | carbonic anhydrase XIII | 377677 | 0.012 | -1.3 |
| 55784_at | MCTP2 | multiple C2 domains, transmembrane 2 | 55784 | 0.0185 | -1.3 |
| 403323_at | FLJ20444 | uncharacterized protein FLJ20444 | 403323 | 0.0455 | -1.3 |
| 51206_at | GP6 | glycoprotein VI (platelet) | 51206 | 0.018 | -1.3 |
| 285600_at | KIAA0825 | KIAA0825 | 285600 | 0.0287 | -1.3 |
| 100506422_at | LOC100506422 | putative deoxyuridine 5'-triphosphate nucleotidohydrolase-like protein FLJ16323 | 100506422 | 0.0042 | -1.3 |
| 30845_at | EHD3 | EH-domain containing 3 | 30845 | 0.0206 | -1.3 |
| 81930_at | KIF18A | kinesin family member 18A | 81930 | 0.0092 | -1.3 |
| 284759_at | SIRPB2 | signal-regulatory protein beta 2 | 284759 | 0.0251 | -1.3 |
| 5742_at | PTGS1 | prostaglandin-endoperoxide synthase 1 (prostaglandin G/H synthase and cyclooxygenase) | 5742 | 0.0416 | -1.29 |
| 8850_at | KAT2B | K(lysine) acetyltransferase 2B | 8850 | 0.0294 | -1.29 |
| 10826_at | C5orf4 | chromosome 5 open reading frame 4 | 10826 | 0.042 | -1.29 |
| 23531_at | MMD | monocyte to macrophage differentiation-associated | 23531 | 0.0372 | -1.29 |
| 2321_at | FLT1 | fms-related tyrosine kinase 1 (vascular endothelial growth factor/vascular permeability factor receptor) | 2321 | 0.0425 | -1.29 |
| 58496_at | LY6G5B | lymphocyte antigen 6 complex, locus G5B | 58496 | 0.0363 | -1.29 |
| 64218_at | SEMA4A | sema domain, immunoglobulin domain (Ig), transmembrane domain (TM) and short cytoplasmic domain, (semaphorin) 4A | 64218 | 0.0067 | -1.29 |
| 157570_at | ESCO2 | establishment of cohesion 1 homolog 2 (S. cerevisiae) | 157570 | 0.028 | -1.29 |
| 286749_at | STON1-GTF2A1L | STON1-GTF2A1L readthrough | 286749 | 0.0018 | -1.29 |
| 604_at | BCL6 | B-cell CLL/lymphoma 6 | 604 | 0.0072 | -1.29 |
| 286006_at | C7orf53 | chromosome 7 open reading frame 53 | 286006 | 0.0038 | -1.29 |
| 24145_at | PANX1 | pannexin 1 | 24145 | 0.0016 | -1.29 |
| 285172_at | FAM126B | family with sequence similarity 126, member B | 285172 | 0.0284 | -1.29 |
| 1950_at | EGF | epidermal growth factor | 1950 | 0.0491 | -1.28 |
| 6556_at | SLC11A1 | solute carrier family 11 (proton-coupled divalent metal ion transporters), member 1 | 6556 | 0.0101 | -1.28 |
| 3759_at | KCNJ2 | potassium inwardly-rectifying channel, subfamily J, member 2 | 3759 | 0.0444 | -1.28 |
| 2781_at | GNAZ | guanine nucleotide binding protein (G protein), alpha z polypeptide | 2781 | 0.0252 | -1.28 |
| 391257_at | SUMO1P1 | SUMO1 pseudogene 1 | 391257 | 0.0116 | -1.28 |
| 9895_at | TECPR2 | tectonin beta-propeller repeat containing 2 | 9895 | 0.0165 | -1.28 |
| 134728_at | IRAK1BP1 | interleukin-1 receptor-associated kinase 1 binding protein 1 | 134728 | 0.0494 | -1.28 |
| 9304_at | SNORD22 | small nucleolar RNA, C/D box 22 | 9304 | 0.0267 | -1.28 |
| 3475_at | IFRD1 | interferon-related developmental regulator 1 | 3475 | 0.0118 | -1.27 |
| 3198_at | HOXA1 | homeobox A1 | 3198 | 0.0229 | -1.27 |
| 729603_at | LOC729603 | calcium binding protein P22 pseudogene | 729603 | 0.0267 | -1.27 |
| 220929_at | ZNF438 | zinc finger protein 438 | 220929 | 0.0073 | -1.27 |
| 4689_at | NCF4 | neutrophil cytosolic factor 4, 40kDa | 4689 | 0.0053 | -1.27 |
| 85462_at | FHDC1 | FH2 domain containing 1 | 85462 | 0.0018 | -1.27 |
| 57192_at | MCOLN1 | mucolipin 1 | 57192 | 0.0168 | -1.27 |
| 10040_at | TOM1L1 | target of myb1 (chicken)-like 1 | 10040 | 0.0052 | -1.27 |
| 55652_at | SLC48A1 | solute carrier family 48 (heme transporter), member 1 | 55652 | 0.0158 | -1.27 |
| 602_at | BCL3 | B-cell CLL/lymphoma 3 | 602 | 0.0022 | -1.27 |
| 5473_at | PPBP | pro-platelet basic protein (chemokine (C-X-C motif) ligand 7) | 5473 | 0.0306 | -1.27 |
| 51257_at | mar-02 | membrane-associated ring finger (C3HC4) 2, E3 ubiquitin protein ligase | 51257 | 0.0159 | -1.27 |
| 6886_at | TAL1 | T-cell acute lymphocytic leukemia 1 | 6886 | 0.0299 | -1.27 |
| 6843_at | VAMP1 | vesicle-associated membrane protein 1 (synaptobrevin 1) | 6843 | 0.0149 | -1.26 |
| 3257_at | HPS1 | Hermansky-Pudlak syndrome 1 | 3257 | 0.015 | -1.26 |
| 55723_at | ASF1B | ASF1 anti-silencing function 1 homolog B (S. cerevisiae) | 55723 | 0.0112 | -1.26 |
| 55969_at | C20orf24 | chromosome 20 open reading frame 24 | 55969 | 0.0035 | -1.26 |
| 51807_at | TUBA8 | tubulin, alpha 8 | 51807 | 0.0177 | -1.26 |
| 285696_at | LOC285696 | uncharacterized LOC285696 | 285696 | 0.0123 | -1.26 |
| 64101_at | LRRC4 | leucine rich repeat containing 4 | 64101 | 0.0289 | -1.26 |
| 145567_at | TTC7B | tetratricopeptide repeat domain 7B | 145567 | 0.0418 | -1.26 |
| 493856_at | CISD2 | CDGSH iron sulfur domain 2 | 493856 | 0.0402 | -1.26 |
| 552_at | AVPR1A | arginine vasopressin receptor 1A | 552 | 0.0172 | -1.26 |
| 4660_at | PPP1R12B | protein phosphatase 1, regulatory subunit 12B | 4660 | 0.046 | -1.26 |
| 10247_at | HRSP12 | heat-responsive protein 12 | 10247 | 0.0492 | -1.25 |
| 79144_at | PPDPF | pancreatic progenitor cell differentiation and proliferation factor homolog (zebrafish) | 79144 | 0.0346 | -1.25 |
| 54469_at | ZFAND6 | zinc finger, AN1-type domain 6 | 54469 | 0.0393 | -1.25 |
| 11167_at | FSTL1 | follistatin-like 1 | 11167 | 0.0326 | -1.25 |
| 1033_at | CDKN3 | cyclin-dependent kinase inhibitor 3 | 1033 | 0.034 | -1.25 |
| 144195_at | SLC2A14 | solute carrier family 2 (facilitated glucose transporter), member 14 | 144195 | 0.0189 | -1.25 |
| 7739_at | ZNF185 | zinc finger protein 185 (LIM domain) | 7739 | 0.0056 | -1.25 |
| 862_at | RUNX1T1 | runt-related transcription factor 1; translocated to, 1 (cyclin D-related) | 862 | 0.0051 | -1.25 |
| 30061_at | SLC40A1 | solute carrier family 40 (iron-regulated transporter), member 1 | 30061 | 0.0271 | -1.25 |
| 7041_at | TGFB1I1 | transforming growth factor beta 1 induced transcript 1 | 7041 | 0.0116 | -1.25 |
| 767_at | CA8 | carbonic anhydrase VIII | 767 | 0.0066 | -1.24 |
| 92162_at | TMEM88 | transmembrane protein 88 | 92162 | 0.0412 | -1.24 |
| 4211_at | MEIS1 | Meis homeobox 1 | 4211 | 0.0487 | -1.24 |
| 115761_at | ARL11 | ADP-ribosylation factor-like 11 | 115761 | 0.0414 | -1.24 |
| 3383_at | ICAM1 | intercellular adhesion molecule 1 | 3383 | 0.0032 | -1.24 |
| 5002_at | SLC22A18 | solute carrier family 22, member 18 | 5002 | 0.0037 | -1.24 |
| 1193_at | CLIC2 | chloride intracellular channel 2 | 1193 | 0.0443 | -1.24 |
| 1051_at | CEBPB | CCAAT/enhancer binding protein (C/EBP), beta | 1051 | 0.0148 | -1.24 |
| 54851_at | ANKRD49 | ankyrin repeat domain 49 | 54851 | 0.0478 | -1.24 |
| 10178_at | ODZ1 | odz, odd Oz/ten-m homolog 1 (Drosophila) | 10178 | 0.01 | -1.24 |
| 11237_at | RNF24 | ring finger protein 24 | 11237 | 0.0085 | -1.24 |
| 63874_at | ABHD4 | abhydrolase domain containing 4 | 63874 | 0.0005 | -1.24 |
| 1000_at | CDH2 | cadherin 2, type 1, N-cadherin (neuronal) | 1000 | 0.0375 | -1.24 |
| 55113_at | XKR8 | XK, Kell blood group complex subunit-related family, member 8 | 55113 | 0.0086 | -1.24 |
| 27180_at | SIGLEC9 | sialic acid binding Ig-like lectin 9 | 27180 | 0.0148 | -1.24 |
| 26037_at | SIPA1L1 | signal-induced proliferation-associated 1 like 1 | 26037 | 0.0345 | -1.24 |
| 10644_at | IGF2BP2 | insulin-like growth factor 2 mRNA binding protein 2 | 10644 | 0.0297 | -1.23 |
| 55281_at | TMEM140 | transmembrane protein 140 | 55281 | 0.0121 | -1.23 |
| 9619_at | ABCG1 | ATP-binding cassette, sub-family G (WHITE), member 1 | 9619 | 0.0472 | -1.23 |
| 4783_at | NFIL3 | nuclear factor, interleukin 3 regulated | 4783 | 0.0397 | -1.23 |
| 3145_at | HMBS | hydroxymethylbilane synthase | 3145 | 0.0427 | -1.23 |
| 115727_at | RASGRP4 | RAS guanyl releasing protein 4 | 115727 | 0.0137 | -1.23 |
| 57584_at | ARHGAP21 | Rho GTPase activating protein 21 | 57584 | 0.0105 | -1.23 |
| 10435_at | CDC42EP2 | CDC42 effector protein (Rho GTPase binding) 2 | 10435 | 0.0292 | -1.23 |
| 23315_at | SLC9A8 | solute carrier family 9, subfamily A (NHE8, cation proton antiporter 8), member 8 | 23315 | 0.0084 | -1.23 |
| 84418_at | CYSTM1 | cysteine-rich transmembrane module containing 1 | 84418 | 0.0173 | -1.23 |
| 80763_at | C12orf39 | chromosome 12 open reading frame 39 | 80763 | 0.0255 | -1.23 |
| 1384_at | CRAT | carnitine O-acetyltransferase | 1384 | 0.0316 | -1.23 |
| 66008_at | TRAK2 | trafficking protein, kinesin binding 2 | 66008 | 0.0467 | -1.23 |
| 1052_at | CEBPD | CCAAT/enhancer binding protein (C/EBP), delta | 1052 | 0.0079 | -1.23 |
| 395_at | ARHGAP6 | Rho GTPase activating protein 6 | 395 | 0.0499 | -1.23 |
| 54502_at | RBM47 | RNA binding motif protein 47 | 54502 | 0.0221 | -1.23 |
| 3340_at | NDST1 | N-deacetylase/N-sulfotransferase (heparan glucosaminyl) 1 | 3340 | 0.0067 | -1.23 |
| 9520_at | NPEPPS | aminopeptidase puromycin sensitive | 9520 | 0.0128 | -1.23 |
| 81027_at | TUBB1 | tubulin, beta 1 class VI | 81027 | 0.0269 | -1.22 |
| 9586_at | CREB5 | cAMP responsive element binding protein 5 | 9586 | 0.0466 | -1.22 |
| 282991_at | BLOC1S2 | biogenesis of lysosomal organelles complex-1, subunit 2 | 282991 | 0.0406 | -1.22 |
| 10184_at | LHFPL2 | lipoma HMGIC fusion partner-like 2 | 10184 | 0.0177 | -1.22 |
| 7221_at | TRPC2 | transient receptor potential cation channel, subfamily C, member 2, pseudogene | 7221 | 0.0192 | -1.22 |
| 643036_at | SLED1 | proteoglycan 3 pseudogene | 643036 | 0.0483 | -1.22 |
| 8555_at | CDC14B | CDC14 cell division cycle 14 homolog B (S. cerevisiae) | 8555 | 0.0311 | -1.22 |
| 5728_at | PTEN | phosphatase and tensin homolog | 5728 | 0.0236 | -1.22 |
| 643664_at | SLC35G6 | solute carrier family 35, member G6 | 643664 | 0.0399 | -1.22 |
| 58497_at | PRUNE | prune homolog (Drosophila) | 58497 | 0.02 | -1.22 |
| 1263_at | PLK3 | polo-like kinase 3 | 1263 | 0.0105 | -1.22 |
| 79713_at | IGFLR1 | IGF-like family receptor 1 | 79713 | 0.0259 | -1.22 |
| 83643_at | CCDC3 | coiled-coil domain containing 3 | 83643 | 0.0382 | -1.22 |
| 345757_at | FAM174A | family with sequence similarity 174, member A | 345757 | 0.0497 | -1.22 |
| 53407_at | STX18 | syntaxin 18 | 53407 | 0.0216 | -1.21 |
| 84255_at | SLC37A3 | solute carrier family 37 (glycerol-3-phosphate transporter), member 3 | 84255 | 0.0088 | -1.21 |
| 100033447_at | SNORD115-10 | small nucleolar RNA, C/D box 115-10 | 100033447 | 0.0002 | -1.21 |
| 84078_at | KBTBD7 | kelch repeat and BTB (POZ) domain containing 7 | 84078 | 0.0281 | -1.21 |
| 151393_at | FAM82A1 | family with sequence similarity 82, member A1 | 151393 | 0.0346 | -1.21 |
| 1652_at | DDT | D-dopachrome tautomerase | 1652 | 0.0356 | -1.21 |
| 1763_at | DNA2 | DNA replication helicase 2 homolog (yeast) | 1763 | 0.0379 | -1.21 |
| 410_at | ARSA | arylsulfatase A | 410 | 0.0311 | -1.21 |
| 253430_at | IPMK | inositol polyphosphate multikinase | 253430 | 0.0295 | -1.21 |
| 10046_at | MAMLD1 | mastermind-like domain containing 1 | 10046 | 0.0186 | -1.21 |
| 85450_at | ITPRIP | inositol 1,4,5-trisphosphate receptor interacting protein | 85450 | 0.0201 | -1.21 |
| 4814_at | NINJ1 | ninjurin 1 | 4814 | 0.0015 | -1.21 |
| 1026_at | CDKN1A | cyclin-dependent kinase inhibitor 1A (p21, Cip1) | 1026 | 0.0035 | -1.2 |
| 5087_at | PBX1 | pre-B-cell leukemia homeobox 1 | 5087 | 0.0496 | -1.2 |
| 83862_at | TMEM120A | transmembrane protein 120A | 83862 | 0.0017 | -1.2 |
| 1611_at | DAP | death-associated protein | 1611 | 0.0013 | -1.2 |
| 7263_at | TST | thiosulfate sulfurtransferase (rhodanese) | 7263 | 0.0272 | -1.2 |
| 10603_at | SH2B2 | SH2B adaptor protein 2 | 10603 | 0.048 | -1.2 |
| 80256_at | FAM214B | family with sequence similarity 214, member B | 80256 | 0.0091 | -1.2 |
| 1998_at | ELF2 | E74-like factor 2 (ets domain transcription factor) | 1998 | 0.049 | -1.2 |
| 2050_at | EPHB4 | EPH receptor B4 | 2050 | 0.0495 | -1.2 |
| 8395_at | PIP5K1B | phosphatidylinositol-4-phosphate 5-kinase, type I, beta | 8395 | 0.0351 | -1.2 |
| 4122_at | MAN2A2 | mannosidase, alpha, class 2A, member 2 | 4122 | 0.0102 | -1.2 |
| 6386_at | SDCBP | syndecan binding protein (syntenin) | 6386 | 0.0289 | -1.2 |
| 79042_at | TSEN34 | tRNA splicing endonuclease 34 homolog (S. cerevisiae) | 79042 | 0.0245 | -1.2 |
| 90853_at | SPOCD1 | SPOC domain containing 1 | 90853 | 0.0404 | -1.2 |
| 9693_at | RAPGEF2 | Rap guanine nucleotide exchange factor (GEF) 2 | 9693 | 0.0477 | -1.2 |
| 23456_at | ABCB10 | ATP-binding cassette, sub-family B (MDR/TAP), member 10 | 23456 | 0.0006 | -1.2 |
| 91056_at | AP5B1 | adaptor-related protein complex 5, beta 1 subunit | 91056 | 0.0398 | -1.19 |
| 54879_at | ST7L | suppression of tumorigenicity 7 like | 54879 | 0.0206 | -1.19 |
| 201176_at | ARHGAP27 | Rho GTPase activating protein 27 | 201176 | 0.0085 | -1.19 |
| 384_at | ARG2 | arginase, type II | 384 | 0.0458 | -1.19 |
| 241_at | ALOX5AP | arachidonate 5-lipoxygenase-activating protein | 241 | 0.0219 | -1.19 |
| 3752_at | KCND3 | potassium voltage-gated channel, Shal-related subfamily, member 3 | 3752 | 0.0301 | -1.19 |
| 219681_at | ARMC3 | armadillo repeat containing 3 | 219681 | 0.0088 | -1.19 |
| 533_at | ATP6V0B | ATPase, H+ transporting, lysosomal 21kDa, V0 subunit b | 533 | 0.02 | -1.19 |
| 7534_at | YWHAZ | tyrosine 3-monooxygenase/tryptophan 5-monooxygenase activation protein, zeta polypeptide | 7534 | 0.0376 | -1.19 |
| 6006_at | RHCE | Rh blood group, CcEe antigens | 6006 | 0.0137 | -1.19 |
| 57136_at | APMAP | adipocyte plasma membrane associated protein | 57136 | 0.0351 | -1.19 |
| 25907_at | TMEM158 | transmembrane protein 158 (gene/pseudogene) | 25907 | 0.0211 | -1.19 |
| 56121_at | PCDHB15 | protocadherin beta 15 | 56121 | 0.0197 | -1.19 |
| 23254_at | KAZN | kazrin, periplakin interacting protein | 23254 | 0.005 | -1.19 |
| 5089_at | PBX2 | pre-B-cell leukemia homeobox 2 | 5089 | 0.0494 | -1.18 |
| 728_at | C5AR1 | complement component 5a receptor 1 | 728 | 0.0097 | -1.18 |
| 51307_at | FAM53C | family with sequence similarity 53, member C | 51307 | 0.0175 | -1.18 |
| 8650_at | NUMB | numb homolog (Drosophila) | 8650 | 0.0291 | -1.18 |
| 81857_at | MED25 | mediator complex subunit 25 | 81857 | 0.0337 | -1.18 |
| 55691_at | FRMD4A | FERM domain containing 4A | 55691 | 0.0247 | -1.18 |
| 2137_at | EXTL3 | exostoses (multiple)-like 3 | 2137 | 0.0127 | -1.18 |
| 444_at | ASPH | aspartate beta-hydroxylase | 444 | 0.0334 | -1.18 |
| 7090_at | TLE3 | transducin-like enhancer of split 3 (E(sp1) homolog, Drosophila) | 7090 | 0.0102 | -1.18 |
| 79930_at | DOK3 | docking protein 3 | 79930 | 0.0074 | -1.18 |
| 2878_at | GPX3 | glutathione peroxidase 3 (plasma) | 2878 | 0.0162 | -1.18 |
| 81558_at | FAM117A | family with sequence similarity 117, member A | 81558 | 0.0127 | -1.18 |
| 9846_at | GAB2 | GRB2-associated binding protein 2 | 9846 | 0.0382 | -1.18 |
| 165055_at | CCDC138 | coiled-coil domain containing 138 | 165055 | 0.026 | -1.18 |
| 8676_at | STX11 | syntaxin 11 | 8676 | 0.0415 | -1.18 |
| 51363_at | CHST15 | carbohydrate (N-acetylgalactosamine 4-sulfate 6-O) sulfotransferase 15 | 51363 | 0.0121 | -1.18 |
| 339287_at | MSL1 | male-specific lethal 1 homolog (Drosophila) | 339287 | 0.0243 | -1.18 |
| 83931_at | STK40 | serine/threonine kinase 40 | 83931 | 0.0204 | -1.18 |
| 965_at | CD58 | CD58 molecule | 965 | 0.0483 | -1.18 |
| 100288292_at | NA | NA | NA | 0.0217 | -1.18 |
| 6901_at | TAZ | tafazzin | 6901 | 0.0434 | -1.18 |
| 10287_at | RGS19 | regulator of G-protein signaling 19 | 10287 | 0.0057 | -1.18 |
| 1912_at | PHC2 | polyhomeotic homolog 2 (Drosophila) | 1912 | 0.021 | -1.18 |
| 403341_at | ZBTB34 | zinc finger and BTB domain containing 34 | 403341 | 0.0037 | -1.18 |
| 727800_at | RNF208 | ring finger protein 208 | 727800 | 0.0193 | -1.18 |
| 23528_at | ZNF281 | zinc finger protein 281 | 23528 | 0.0192 | -1.18 |
| 9609_at | RAB36 | RAB36, member RAS oncogene family | 9609 | 0.004 | -1.18 |
| 4792_at | NFKBIA | nuclear factor of kappa light polypeptide gene enhancer in B-cells inhibitor, alpha | 4792 | 0.0302 | -1.18 |
| 147991_at | DPY19L3 | dpy-19-like 3 (C. elegans) | 147991 | 0.0477 | -1.18 |
| 27439_at | CECR6 | cat eye syndrome chromosome region, candidate 6 | 27439 | 0.0489 | -1.17 |
| 10312_at | TCIRG1 | T-cell, immune regulator 1, ATPase, H+ transporting, lysosomal V0 subunit A3 | 10312 | 0.0013 | -1.17 |
| 55884_at | WSB2 | WD repeat and SOCS box containing 2 | 55884 | 0.0064 | -1.17 |
| 3632_at | INPP5A | inositol polyphosphate-5-phosphatase, 40kDa | 3632 | 0.0396 | -1.17 |
| 23218_at | NBEAL2 | neurobeachin-like 2 | 23218 | 0.0164 | -1.17 |
| 162989_at | DEDD2 | death effector domain containing 2 | 162989 | 0.0004 | -1.17 |
| 2629_at | GBA | glucosidase, beta, acid | 2629 | 0.0268 | -1.17 |
| 1441_at | CSF3R | colony stimulating factor 3 receptor (granulocyte) | 1441 | 0.0064 | -1.17 |
| 5862_at | RAB2A | RAB2A, member RAS oncogene family | 5862 | 0.0495 | -1.17 |
| 3797_at | KIF3C | kinesin family member 3C | 3797 | 0.0363 | -1.17 |
| 2057_at | EPOR | erythropoietin receptor | 2057 | 0.035 | -1.17 |
| 81501_at | DCSTAMP | dendrocyte expressed seven transmembrane protein | 81501 | 0.0428 | -1.17 |
| 2874_at | GPS2 | G protein pathway suppressor 2 | 2874 | 0.0068 | -1.17 |
| 240_at | ALOX5 | arachidonate 5-lipoxygenase | 240 | 0.0439 | -1.17 |
| 5691_at | PSMB3 | proteasome (prosome, macropain) subunit, beta type, 3 | 5691 | 0.0215 | -1.17 |
| 5232_at | PGK2 | phosphoglycerate kinase 2 | 5232 | 0.002 | -1.17 |
| 374864_at | C18orf34 | chromosome 18 open reading frame 34 | 374864 | 0.0143 | -1.17 |
| 7272_at | TTK | TTK protein kinase | 7272 | 0.0294 | -1.17 |
| 27350_at | APOBEC3C | apolipoprotein B mRNA editing enzyme, catalytic polypeptide-like 3C | 27350 | 0.0338 | -1.17 |
| 7133_at | TNFRSF1B | tumor necrosis factor receptor superfamily, member 1B | 7133 | 0.049 | -1.17 |
| 8390_at | OR1G1 | olfactory receptor, family 1, subfamily G, member 1 | 8390 | 0.0175 | -1.17 |
| 8907_at | AP1M1 | adaptor-related protein complex 1, mu 1 subunit | 8907 | 0.0442 | -1.17 |
| 7982_at | ST7 | suppression of tumorigenicity 7 | 7982 | 0.0488 | -1.16 |
| 9673_at | SLC25A44 | solute carrier family 25, member 44 | 9673 | 0.0054 | -1.16 |
| 2319_at | FLOT2 | flotillin 2 | 2319 | 0.0455 | -1.16 |
| 5187_at | PER1 | period homolog 1 (Drosophila) | 5187 | 0.0492 | -1.16 |
| 25898_at | RCHY1 | ring finger and CHY zinc finger domain containing 1, E3 ubiquitin protein ligase | 25898 | 0.0447 | -1.16 |
| 56108_at | PCDHGA7 | protocadherin gamma subfamily A, 7 | 56108 | 0.0114 | -1.16 |
| 594839_at | SNORA33 | small nucleolar RNA, H/ACA box 33 | 594839 | 0.006 | -1.16 |
| 53918_at | PELO | pelota homolog (Drosophila) | 53918 | 0.0323 | -1.16 |
| 55191_at | NADSYN1 | NAD synthetase 1 | 55191 | 0.0202 | -1.16 |
| 84066_at | TEX35 | testis expressed 35 | 84066 | 0.0123 | -1.16 |
| 729991_at | MEF2BNB | MEF2B neighbor | 729991 | 0.0338 | -1.16 |
| 5432_at | POLR2C | polymerase (RNA) II (DNA directed) polypeptide C, 33kDa | 5432 | 0.0132 | -1.16 |
| 6136_at | RPL12 | ribosomal protein L12 | 6136 | 0.0296 | -1.16 |
| 6547_at | SLC8A3 | solute carrier family 8 (sodium/calcium exchanger), member 3 | 6547 | 0.0331 | -1.16 |
| 26020_at | LRP10 | low density lipoprotein receptor-related protein 10 | 26020 | 0.0038 | -1.16 |
| 286826_at | LIN9 | lin-9 homolog (C. elegans) | 286826 | 0.0243 | -1.16 |
| 51317_at | PHF21A | PHD finger protein 21A | 51317 | 0.0304 | -1.16 |
| 55741_at | EDEM2 | ER degradation enhancer, mannosidase alpha-like 2 | 55741 | 0.0388 | -1.16 |
| 54801_at | HAUS6 | HAUS augmin-like complex, subunit 6 | 54801 | 0.046 | -1.16 |
| 56123_at | PCDHB13 | protocadherin beta 13 | 56123 | 0.0264 | -1.16 |
| 677_at | ZFP36L1 | zinc finger protein 36, C3H type-like 1 | 677 | 0.0351 | -1.16 |
| 1727_at | CYB5R3 | cytochrome b5 reductase 3 | 1727 | 0.0175 | -1.16 |
| 10313_at | RTN3 | reticulon 3 | 10313 | 0.0188 | -1.16 |
| 64122_at | FN3K | fructosamine 3 kinase | 64122 | 0.0461 | -1.16 |
| 54968_at | TMEM70 | transmembrane protein 70 | 54968 | 0.0068 | -1.16 |
| 79628_at | SH3TC2 | SH3 domain and tetratricopeptide repeats 2 | 79628 | 0.02 | -1.16 |
| 8531_at | CSDA | cold shock domain protein A | 8531 | 0.0244 | -1.16 |
| 84243_at | ZDHHC18 | zinc finger, DHHC-type containing 18 | 84243 | 0.0165 | -1.16 |
| 2157_at | F8 | coagulation factor VIII, procoagulant component | 2157 | 0.0293 | -1.16 |
| 64081_at | PBLD | phenazine biosynthesis-like protein domain containing | 64081 | 0.0302 | -1.16 |
| 283219_at | KCTD21 | potassium channel tetramerisation domain containing 21 | 283219 | 0.0308 | -1.15 |
| 9704_at | DHX34 | DEAH (Asp-Glu-Ala-His) box polypeptide 34 | 9704 | 0.0473 | -1.15 |
| 54583_at | EGLN1 | egl nine homolog 1 (C. elegans) | 54583 | 0.0183 | -1.15 |
| 56099_at | PCDHGB7 | protocadherin gamma subfamily B, 7 | 56099 | 0.0479 | -1.15 |
| 9468_at | PCYT1B | phosphate cytidylyltransferase 1, choline, beta | 9468 | 0.0253 | -1.15 |
| 112849_at | L3HYPDH | L-3-hydroxyproline dehydratase (trans-) | 112849 | 0.0482 | -1.15 |
| 10307_at | APBB3 | amyloid beta (A4) precursor protein-binding, family B, member 3 | 10307 | 0.0287 | -1.15 |
| 150275_at | CCDC117 | coiled-coil domain containing 117 | 150275 | 0.0181 | -1.15 |
| 51725_at | FBXO40 | F-box protein 40 | 51725 | 0.0281 | -1.15 |
| 5997_at | RGS2 | regulator of G-protein signaling 2, 24kDa | 5997 | 0.0462 | -1.15 |
| 51279_at | C1RL | complement component 1, r subcomponent-like | 51279 | 0.0277 | -1.15 |
| 79873_at | NUDT18 | nudix (nucleoside diphosphate linked moiety X)-type motif 18 | 79873 | 0.0065 | -1.15 |
| 147741_at | ZNF560 | zinc finger protein 560 | 147741 | 0.0191 | -1.15 |
| 150082_at | LCA5L | Leber congenital amaurosis 5-like | 150082 | 0.0056 | -1.15 |
| 8698_at | S1PR4 | sphingosine-1-phosphate receptor 4 | 8698 | 0.0088 | -1.15 |
| 11035_at | RIPK3 | receptor-interacting serine-threonine kinase 3 | 11035 | 0.0148 | -1.15 |
| 150372_at | NFAM1 | NFAT activating protein with ITAM motif 1 | 150372 | 0.0472 | -1.15 |
| 57222_at | ERGIC1 | endoplasmic reticulum-golgi intermediate compartment (ERGIC) 1 | 57222 | 0.0289 | -1.15 |
| 65125_at | WNK1 | WNK lysine deficient protein kinase 1 | 65125 | 0.041 | -1.15 |
| 51304_at | ZDHHC3 | zinc finger, DHHC-type containing 3 | 51304 | 0.0165 | -1.14 |
| 343069_at | HNRNPCL1 | heterogeneous nuclear ribonucleoprotein C-like 1 | 343069 | 0.0485 | -1.14 |
| 8569_at | MKNK1 | MAP kinase interacting serine/threonine kinase 1 | 8569 | 0.0199 | -1.14 |
| 79567_at | FAM65A | family with sequence similarity 65, member A | 79567 | 0.045 | -1.14 |
| 9091_at | PIGQ | phosphatidylinositol glycan anchor biosynthesis, class Q | 9091 | 0.0145 | -1.14 |
| 81788_at | NUAK2 | NUAK family, SNF1-like kinase, 2 | 81788 | 0.0422 | -1.14 |
| 121260_at | SLC15A4 | solute carrier family 15, member 4 | 121260 | 0.0251 | -1.14 |
| 10825_at | NEU3 | sialidase 3 (membrane sialidase) | 10825 | 0.0193 | -1.14 |
| 1604_at | CD55 | CD55 molecule, decay accelerating factor for complement (Cromer blood group) | 1604 | 0.0296 | -1.14 |
| 91252_at | SLC39A13 | solute carrier family 39 (zinc transporter), member 13 | 91252 | 0.0325 | -1.14 |
| 83452_at | RAB33B | RAB33B, member RAS oncogene family | 83452 | 0.0131 | -1.14 |
| 390649_at | OR4F15 | olfactory receptor, family 4, subfamily F, member 15 | 390649 | 0.0313 | -1.14 |
| 55147_at | RBM23 | RNA binding motif protein 23 | 55147 | 0.0037 | -1.14 |
| 171391_at | NS3BP | NS3BP | 171391 | 0.0303 | -1.14 |
| 6397_at | SEC14L1 | SEC14-like 1 (S. cerevisiae) | 6397 | 0.039 | -1.14 |
| 64332_at | NFKBIZ | nuclear factor of kappa light polypeptide gene enhancer in B-cells inhibitor, zeta | 64332 | 0.0264 | -1.14 |
| 26502_at | NARF | nuclear prelamin A recognition factor | 26502 | 0.0378 | -1.14 |
| 645191_at | LINGO3 | leucine rich repeat and Ig domain containing 3 | 645191 | 0.0417 | -1.14 |
| 10221_at | TRIB1 | tribbles homolog 1 (Drosophila) | 10221 | 0.0305 | -1.14 |
| 100033809_at | SNORD115-35 | small nucleolar RNA, C/D box 115-35 | 100033809 | 0.0307 | -1.14 |
| 144321_at | GLIPR1L2 | GLI pathogenesis-related 1 like 2 | 144321 | 0.0137 | -1.14 |
| 619555_at | MIR487A | microRNA 487a | 619555 | 0.0067 | -1.14 |
| 8328_at | GFI1B | growth factor independent 1B transcription repressor | 8328 | 0.028 | -1.14 |
| 9567_at | GTPBP1 | GTP binding protein 1 | 9567 | 0.0094 | -1.14 |
| 9863_at | MAGI2 | membrane associated guanylate kinase, WW and PDZ domain containing 2 | 9863 | 0.0296 | -1.13 |
| 5164_at | PDK2 | pyruvate dehydrogenase kinase, isozyme 2 | 5164 | 0.0201 | -1.13 |
| 54961_at | SSH3 | slingshot homolog 3 (Drosophila) | 54961 | 0.0073 | -1.13 |
| 3482_at | IGF2R | insulin-like growth factor 2 receptor | 3482 | 0.0364 | -1.13 |
| 1831_at | TSC22D3 | TSC22 domain family, member 3 | 1831 | 0.0144 | -1.13 |
| 8563_at | THOC5 | THO complex 5 | 8563 | 0.0428 | -1.13 |
| 51292_at | GMPR2 | guanosine monophosphate reductase 2 | 51292 | 0.0187 | -1.13 |
| 114785_at | MBD6 | methyl-CpG binding domain protein 6 | 114785 | 0.0353 | -1.13 |
| 118987_at | PDZD8 | PDZ domain containing 8 | 118987 | 0.0468 | -1.13 |
| 6736_at | SRY | sex determining region Y | 6736 | 0.0229 | -1.13 |
| 8079_at | MLF2 | myeloid leukemia factor 2 | 8079 | 0.0277 | -1.13 |
| 29953_at | TRHDE | thyrotropin-releasing hormone degrading enzyme | 29953 | 0.0316 | -1.13 |
| 3460_at | IFNGR2 | interferon gamma receptor 2 (interferon gamma transducer 1) | 3460 | 0.0137 | -1.13 |
| 22853_at | LMTK2 | lemur tyrosine kinase 2 | 22853 | 0.0257 | -1.13 |
| 90288_at | EFCAB12 | EF-hand calcium binding domain 12 | 90288 | 0.0313 | -1.13 |
| 83719_at | YPEL3 | yippee-like 3 (Drosophila) | 83719 | 0.0171 | -1.13 |
| 4851_at | NOTCH1 | notch 1 | 4851 | 0.0453 | -1.13 |
| 55841_at | WWC3 | WWC family member 3 | 55841 | 0.0116 | -1.13 |
| 9191_at | DEDD | death effector domain containing | 9191 | 0.0359 | -1.13 |
| 23582_at | CCNDBP1 | cyclin D-type binding-protein 1 | 23582 | 0.0437 | -1.13 |
| 2752_at | GLUL | glutamate-ammonia ligase | 2752 | 0.0156 | -1.12 |
| 92552_at | ATXN3L | ataxin 3-like | 92552 | 0.0452 | -1.12 |
| 9927_at | MFN2 | mitofusin 2 | 9927 | 0.0499 | -1.12 |
| 4209_at | MEF2D | myocyte enhancer factor 2D | 4209 | 0.0137 | -1.12 |
| 58513_at | EPS15L1 | epidermal growth factor receptor pathway substrate 15-like 1 | 58513 | 0.0206 | -1.12 |
| 23295_at | MGRN1 | mahogunin ring finger 1, E3 ubiquitin protein ligase | 23295 | 0.0133 | -1.12 |
| 10226_at | PLIN3 | perilipin 3 | 10226 | 0.028 | -1.12 |
| 6811_at | STX5 | syntaxin 5 | 6811 | 0.0453 | -1.12 |
| 65996_at | MGC2752 | CENPB DNA-binding domains containing 1 pseudogene | 65996 | 0.0371 | -1.12 |
| 10336_at | PCGF3 | polycomb group ring finger 3 | 10336 | 0.0226 | -1.12 |
| 25976_at | TIPARP | TCDD-inducible poly(ADP-ribose) polymerase | 25976 | 0.0419 | -1.12 |
| 64744_at | SMAP2 | small ArfGAP2 | 64744 | 0.0207 | -1.12 |
| 55437_at | STRADB | STE20-related kinase adaptor beta | 55437 | 0.0066 | -1.12 |
| 57213_at | SPRYD7 | SPRY domain containing 7 | 57213 | 0.0171 | -1.12 |
| 57704_at | GBA2 | glucosidase, beta (bile acid) 2 | 57704 | 0.0232 | -1.12 |
| 2033_at | EP300 | E1A binding protein p300 | 2033 | 0.05 | -1.12 |
| 64333_at | ARHGAP9 | Rho GTPase activating protein 9 | 64333 | 0.0198 | -1.12 |
| 22843_at | PPM1E | protein phosphatase, Mg2+/Mn2+ dependent, 1E | 22843 | 0.0376 | -1.11 |
| 219436_at | OR5D14 | olfactory receptor, family 5, subfamily D, member 14 | 219436 | 0.0065 | -1.11 |
| 5261_at | PHKG2 | phosphorylase kinase, gamma 2 (testis) | 5261 | 0.0467 | -1.11 |
| 777_at | CACNA1E | calcium channel, voltage-dependent, R type, alpha 1E subunit | 777 | 0.0409 | -1.11 |
| 2346_at | FOLH1 | folate hydrolase (prostate-specific membrane antigen) 1 | 2346 | 0.0308 | -1.11 |
| 57658_at | CALCOCO1 | calcium binding and coiled-coil domain 1 | 57658 | 0.0199 | -1.11 |
| 51629_at | SLC25A39 | solute carrier family 25, member 39 | 51629 | 0.0348 | -1.11 |
| 8273_at | SLC10A3 | solute carrier family 10 (sodium/bile acid cotransporter family), member 3 | 8273 | 0.0469 | -1.11 |
| 10671_at | DCTN6 | dynactin 6 | 10671 | 0.0291 | -1.11 |
| 311_at | ANXA11 | annexin A11 | 311 | 0.016 | -1.11 |
| 9230_at | RAB11B | RAB11B, member RAS oncogene family | 9230 | 0.0347 | -1.11 |
| 1398_at | CRK | v-crk sarcoma virus CT10 oncogene homolog (avian) | 1398 | 0.0417 | -1.11 |
| 795_at | S100G | S100 calcium binding protein G | 795 | 0.0155 | -1.11 |
| 64396_at | GMCL1P1 | germ cell-less, spermatogenesis associated 1 pseudogene 1 | 64396 | 0.0244 | -1.11 |
| 497661_at | C18orf32 | chromosome 18 open reading frame 32 | 497661 | 0.0272 | -1.1 |
| 51705_at | EMCN | endomucin | 51705 | 0.0296 | -1.1 |
| 55852_at | TEX2 | testis expressed 2 | 55852 | 0.029 | -1.1 |
| 9807_at | IP6K1 | inositol hexakisphosphate kinase 1 | 9807 | 0.0346 | -1.1 |
| 7353_at | UFD1L | ubiquitin fusion degradation 1 like (yeast) | 7353 | 0.0157 | -1.1 |
| 7545_at | ZIC1 | Zic family member 1 | 7545 | 0.0232 | -1.1 |
| 9516_at | LITAF | lipopolysaccharide-induced TNF factor | 9516 | 0.0037 | -1.1 |
| 40_at | ASIC2 | acid-sensing (proton-gated) ion channel 2 | 40 | 0.0116 | -1.1 |
| 23387_at | SIK3 | SIK family kinase 3 | 23387 | 0.0419 | -1.1 |
| 79089_at | TMUB2 | transmembrane and ubiquitin-like domain containing 2 | 79089 | 0.0168 | -1.1 |
| 11316_at | COPE | coatomer protein complex, subunit epsilon | 11316 | 0.0467 | -1.1 |
| 9146_at | HGS | hepatocyte growth factor-regulated tyrosine kinase substrate | 9146 | 0.0146 | -1.1 |
| 8878_at | SQSTM1 | sequestosome 1 | 8878 | 0.0241 | -1.1 |
| 139212_at | PIH1D3 | PIH1 domain containing 3 | 139212 | 0.0211 | -1.1 |
| 10383_at | TUBB4B | tubulin, beta 4B class IVb | 10383 | 0.0399 | -1.1 |
| 129881_at | CCDC173 | coiled-coil domain containing 173 | 129881 | 0.0097 | -1.1 |
| 391_at | RHOG | ras homolog family member G | 391 | 0.0261 | -1.1 |
| 64224_at | HERPUD2 | HERPUD family member 2 | 64224 | 0.0359 | -1.1 |
| 55374_at | TMCO6 | transmembrane and coiled-coil domains 6 | 55374 | 0.0037 | -1.09 |
| 84305_at | WIBG | within bgcn homolog (Drosophila) | 84305 | 0.0425 | -1.09 |
| 92092_at | ZC3HAV1L | zinc finger CCCH-type, antiviral 1-like | 92092 | 0.0416 | -1.09 |
| 51094_at | ADIPOR1 | adiponectin receptor 1 | 51094 | 0.0318 | -1.09 |
| 10245_at | TIMM17B | translocase of inner mitochondrial membrane 17 homolog B (yeast) | 10245 | 0.0334 | -1.09 |
| 127385_at | OR10J5 | olfactory receptor, family 10, subfamily J, member 5 | 127385 | 0.0177 | -1.09 |
| 60509_at | AGBL5 | ATP/GTP binding protein-like 5 | 60509 | 0.0297 | -1.09 |
| 200186_at | CRTC2 | CREB regulated transcription coactivator 2 | 200186 | 0.0141 | -1.09 |
| 51780_at | KDM3B | lysine (K)-specific demethylase 3B | 51780 | 0.0278 | -1.09 |
| 57153_at | SLC44A2 | solute carrier family 44, member 2 | 57153 | 0.0124 | -1.09 |
| 10616_at | RBCK1 | RanBP-type and C3HC4-type zinc finger containing 1 | 10616 | 0.0199 | -1.09 |
| 9827_at | RGP1 | RGP1 retrograde golgi transport homolog (S. cerevisiae) | 9827 | 0.0162 | -1.09 |
| 128637_at | TBC1D20 | TBC1 domain family, member 20 | 128637 | 0.0059 | -1.09 |
| 79036_at | KXD1 | KxDL motif containing 1 | 79036 | 0.0313 | -1.09 |
| 26231_at | LRRC29 | leucine rich repeat containing 29 | 26231 | 0.0217 | -1.09 |
| 55095_at | SAMD4B | sterile alpha motif domain containing 4B | 55095 | 0.0029 | -1.09 |
| 5127_at | CDK16 | cyclin-dependent kinase 16 | 5127 | 0.0153 | -1.09 |
| 408187_at | SPINK14 | serine peptidase inhibitor, Kazal type 14 (putative) | 408187 | 0.022 | -1.09 |
| 51755_at | CDK12 | cyclin-dependent kinase 12 | 51755 | 0.0424 | -1.08 |
| 79939_at | SLC35E1 | solute carrier family 35, member E1 | 79939 | 0.0218 | -1.08 |
| 9095_at | TBX19 | T-box 19 | 9095 | 0.0405 | -1.08 |
| 896_at | CCND3 | cyclin D3 | 896 | 0.0271 | -1.08 |
| 5552_at | SRGN | serglycin | 5552 | 0.042 | -1.08 |
| 10324_at | KBTBD10 | kelch repeat and BTB (POZ) domain containing 10 | 10324 | 0.0278 | -1.07 |
| 126308_at | MOB3A | MOB kinase activator 3A | 126308 | 0.0485 | -1.07 |
| 8513_at | LIPF | lipase, gastric | 8513 | 0.0206 | -1.07 |
| 2542_at | SLC37A4 | solute carrier family 37 (glucose-6-phosphate transporter), member 4 | 2542 | 0.035 | -1.07 |
| 4225_at | MEP1B | meprin A, beta | 4225 | 0.0269 | -1.07 |
| 527_at | ATP6V0C | ATPase, H+ transporting, lysosomal 16kDa, V0 subunit c | 527 | 0.0364 | -1.07 |
| 10581_at | IFITM2 | interferon induced transmembrane protein 2 | 10581 | 0.0405 | -1.06 |
| 23510_at | KCTD2 | potassium channel tetramerisation domain containing 2 | 23510 | 0.0291 | -1.05 |
|  |  |  |  |  |  |
| *Genes up-regulated in the Adults* | | | | | |
| **Gene_Id** | **Gene_Symbol** | **Gene_Description** | **Entrez_Id** | **P-value** | **Fold Change** |
| 28468_at | IGHV1-18 | immunoglobulin heavy variable 1-18 | 28468 | 0.00563789 | 2.052146939 |
| 28559_at | TRBV28 | T cell receptor beta variable 28 | 28559 | 0.023242882 | 1.946055906 |
| 28825_at | IGLV1-40 | immunoglobulin lambda variable 1-40 | 28825 | 0.0369843 | 1.774227687 |
| 28449_at | IGHV3-13 | immunoglobulin heavy variable 3-13 | 28449 | 0.006530802 | 1.728937711 |
| 3514_at | IGKC | immunoglobulin kappa constant | 3514 | 0.002750221 | 1.725511796 |
| 28908_at | IGKV4-1 | immunoglobulin kappa variable 4-1 | 28908 | 0.026291218 | 1.707035476 |
| 28451_at | IGHV3-9 | immunoglobulin heavy variable 3-9 | 28451 | 0.040163447 | 1.684291954 |
| 28778_at | IGLV6-57 | immunoglobulin lambda variable 6-57 | 28778 | 0.026074594 | 1.590539848 |
| 4907_at | NT5E | 5'-nucleotidase, ecto (CD73) | 4907 | 0.041358059 | 1.524905563 |
| 57282_at | SLC4A10 | solute carrier family 4, sodium bicarbonate transporter, member 10 | 57282 | 0.029316877 | 1.51156883 |
| 28714_at | TRAJ41 | T cell receptor alpha joining 41 | 28714 | 0.040610241 | 1.507094251 |
| 118433_at | RPL23AP7 | ribosomal protein L23a pseudogene 7 | 118433 | 0.025381369 | 1.463931219 |
| 4753_at | NELL2 | NEL-like 2 (chicken) | 4753 | 0.048463477 | 1.457924772 |
| 81618_at | ITM2C | integral membrane protein 2C | 81618 | 0.015008032 | 1.425731226 |
| 83259_at | PCDH11Y | protocadherin 11 Y-linked | 83259 | 0.023228434 | 1.421033041 |
| 28466_at | IGHV1-45 | immunoglobulin heavy variable 1-45 | 28466 | 0.003325962 | 1.419403744 |
| 4897_at | NRCAM | neuronal cell adhesion molecule | 4897 | 0.012002748 | 1.415960236 |
| 911_at | CD1C | CD1c molecule | 911 | 0.011804422 | 1.411652247 |
| 28907_at | IGKV5-2 | immunoglobulin kappa variable 5-2 | 28907 | 0.002367934 | 1.402397491 |
| 1380_at | CR2 | complement component (3d/Epstein Barr virus) receptor 2 | 1380 | 0.031235656 | 1.401308539 |
| 9241_at | NOG | noggin | 9241 | 0.013758231 | 1.396284446 |
| 4830_at | NME1 | NME/NM23 nucleoside diphosphate kinase 1 | 4830 | 0.033540165 | 1.386382582 |
| 10723_at | SLC12A7 | solute carrier family 12 (potassium/chloride transporters), member 7 | 10723 | 0.02375529 | 1.385296747 |
| 284942_at | RPL23AP82 | ribosomal protein L23a pseudogene 82 | 284942 | 0.020277546 | 1.384147234 |
| 122618_at | PLD4 | phospholipase D family, member 4 | 122618 | 0.014078975 | 1.383295074 |
| 6130_at | RPL7A | ribosomal protein L7a | 6130 | 0.041077978 | 1.352785099 |
| 28904_at | IGKV1D-8 | immunoglobulin kappa variable 1D-8 | 28904 | 0.034256868 | 1.342589834 |
| 6192_at | RPS4Y1 | ribosomal protein S4, Y-linked 1 | 6192 | 0.016800405 | 1.338223666 |
| 28773_at | IGLV9-49 | immunoglobulin lambda variable 9-49 | 28773 | 0.015268378 | 1.337712433 |
| 5796_at | PTPRK | protein tyrosine phosphatase, receptor type, K | 5796 | 0.002657092 | 1.337268615 |
| 342926_at | ZNF677 | zinc finger protein 677 | 342926 | 0.002600048 | 1.336709751 |
| 353135_at | LCE1E | late cornified envelope 1E | 353135 | 0.003118745 | 1.334931712 |
| 9834_at | KIAA0125 | KIAA0125 | 9834 | 0.024153229 | 1.328790746 |
| 79411_at | GLB1L | galactosidase, beta 1-like | 79411 | 0.030676114 | 1.328705192 |
| 1038_at | CDR1 | cerebellar degeneration-related protein 1, 34kDa | 1038 | 0.019637322 | 1.324347807 |
| 28803_at | IGLV3-10 | immunoglobulin lambda variable 3-10 | 28803 | 0.042694591 | 1.323424521 |
| 100130100_at | LOC100130100 | Ig kappa chain V-I region Walker-like | 100130100 | 0.003219969 | 1.321166502 |
| 401994_at | OR14I1 | olfactory receptor, family 14, subfamily I, member 1 | 401994 | 0.018471163 | 1.31331104 |
| 9551_at | ATP5J2 | ATP synthase, H+ transporting, mitochondrial Fo complex, subunit F2 | 9551 | 0.002506624 | 1.312913887 |
| 8359_at | HIST1H4A | histone cluster 1, H4a | 8359 | 0.020958346 | 1.305197682 |
| 168537_at | GIMAP7 | GTPase, IMAP family member 7 | 168537 | 0.015166141 | 1.299192144 |
| 25849_at | PARM1 | prostate androgen-regulated mucin-like protein 1 | 25849 | 0.045558063 | 1.29210953 |
| 337976_at | KRTAP20-2 | keratin associated protein 20-2 | 337976 | 0.001975834 | 1.291030119 |
| 4691_at | NCL | nucleolin | 4691 | 0.009085019 | 1.28976556 |
| 100507167_at | NA | NA | NA | 0.048185602 | 1.289082509 |
| 57124_at | CD248 | CD248 molecule, endosialin | 57124 | 0.028523882 | 1.288101777 |
| 339803_at | LOC339803 | uncharacterized LOC339803 | 339803 | 0.025115119 | 1.284385856 |
| 25858_at | C11orf20 | chromosome 11 open reading frame 20 | 25858 | 0.044157204 | 1.281474996 |
| 85453_at | TSPYL5 | TSPY-like 5 | 85453 | 0.005904235 | 1.280667411 |
| 4609_at | MYC | v-myc myelocytomatosis viral oncogene homolog (avian) | 4609 | 0.003062097 | 1.278067597 |
| 219854_at | TMEM218 | transmembrane protein 218 | 219854 | 0.000796194 | 1.277783665 |
| 4104_at | MAGEA5 | melanoma antigen family A, 5 | 4104 | 0.018681117 | 1.276142797 |
| 79986_at | ZNF702P | zinc finger protein 702, pseudogene | 79986 | 0.029151984 | 1.273087399 |
| 26767_at | RNU105B | RNA, U105B small nucleolar | 26767 | 0.003938136 | 1.26960747 |
| 56271_at | BEX4 | brain expressed, X-linked 4 | 56271 | 0.020471949 | 1.26299976 |
| 2317_at | FLNB | filamin B, beta | 2317 | 0.002058479 | 1.260428138 |
| 593_at | BCKDHA | branched chain keto acid dehydrogenase E1, alpha polypeptide | 593 | 0.03846285 | 1.258041792 |
| 9215_at | LARGE | like-glycosyltransferase | 9215 | 0.011239617 | 1.257085892 |
| 27075_at | TSPAN13 | tetraspanin 13 | 27075 | 0.040841078 | 1.256382285 |
| 6713_at | SQLE | squalene epoxidase | 6713 | 0.017891785 | 1.255821372 |
| 79365_at | BHLHE41 | basic helix-loop-helix family, member e41 | 79365 | 0.015882157 | 1.255640827 |
| 10803_at | CCR9 | chemokine (C-C motif) receptor 9 | 10803 | 0.013878447 | 1.254278074 |
| 55646_at | LYAR | Ly1 antibody reactive homolog (mouse) | 55646 | 0.004851028 | 1.253689294 |
| 8721_at | EDF1 | endothelial differentiation-related factor 1 | 8721 | 0.029025197 | 1.252650985 |
| 26974_at | ZNF285 | zinc finger protein 285 | 26974 | 0.018799428 | 1.252106573 |
| 3956_at | LGALS1 | lectin, galactoside-binding, soluble, 1 | 3956 | 0.018867886 | 1.251762597 |
| 84300_at | MNF1 | mitochondrial nucleoid factor 1 | 84300 | 0.006258355 | 1.248808743 |
| 10276_at | NET1 | neuroepithelial cell transforming 1 | 10276 | 0.027483229 | 1.246656507 |
| 3569_at | IL6 | interleukin 6 (interferon, beta 2) | 3569 | 0.005869488 | 1.244157937 |
| 79015_at | LOC79015 | uncharacterized LOC79015 | 79015 | 0.01701613 | 1.243197824 |
| 28903_at | IGKV1D-12 | immunoglobulin kappa variable 1D-12 | 28903 | 0.020482095 | 1.24306272 |
| 56128_at | PCDHB8 | protocadherin beta 8 | 56128 | 0.012073021 | 1.240809751 |
| 9374_at | PPT2 | palmitoyl-protein thioesterase 2 | 9374 | 0.013749138 | 1.240396413 |
| 10436_at | EMG1 | EMG1 nucleolar protein homolog (S. cerevisiae) | 10436 | 0.0043311 | 1.236509986 |
| 57134_at | MAN1C1 | mannosidase, alpha, class 1C, member 1 | 57134 | 0.034259559 | 1.233902806 |
| 126259_at | TMIGD2 | transmembrane and immunoglobulin domain containing 2 | 126259 | 0.007886079 | 1.233471076 |
| 10715_at | CERS1 | ceramide synthase 1 | 10715 | 0.028264726 | 1.233312909 |
| 55655_at | NLRP2 | NLR family, pyrin domain containing 2 | 55655 | 0.026138461 | 1.232363395 |
| 51605_at | TRMT6 | tRNA methyltransferase 6 homolog (S. cerevisiae) | 51605 | 0.004958099 | 1.231892864 |
| 401145_at | FAM190A | family with sequence similarity 190, member A | 401145 | 0.024512578 | 1.230805667 |
| 677780_at | SCARNA11 | small Cajal body-specific RNA 11 | 677780 | 0.007727651 | 1.230200878 |
| 84311_at | MRPL45 | mitochondrial ribosomal protein L45 | 84311 | 0.006316782 | 1.229099683 |
| 56652_at | C10orf2 | chromosome 10 open reading frame 2 | 56652 | 0.044362817 | 1.227149084 |
| 79690_at | GAL3ST4 | galactose-3-O-sulfotransferase 4 | 79690 | 0.012745452 | 1.226778445 |
| 8668_at | EIF3I | eukaryotic translation initiation factor 3, subunit I | 8668 | 0.014530204 | 1.224556877 |
| 123169_at | LEO1 | Leo1, Paf1/RNA polymerase II complex component, homolog (S. cerevisiae) | 123169 | 0.004372393 | 1.222633315 |
| 2091_at | FBL | fibrillarin | 2091 | 0.006531068 | 1.222611677 |
| 140731_at | ANKRD60 | ankyrin repeat domain 60 | 140731 | 0.010971282 | 1.220393473 |
| 407022_at | MIR296 | microRNA 296 | 407022 | 0.038418536 | 1.220171367 |
| 51504_at | TRMT112 | tRNA methyltransferase 11-2 homolog (S. cerevisiae) | 51504 | 0.009928326 | 1.219815436 |
| 1470_at | CST2 | cystatin SA | 1470 | 0.047268916 | 1.219364266 |
| 115_at | ADCY9 | adenylate cyclase 9 | 115 | 0.030253707 | 1.218125566 |
| 9360_at | PPIG | peptidylprolyl isomerase G (cyclophilin G) | 9360 | 0.010696548 | 1.216301593 |
| 5471_at | PPAT | phosphoribosyl pyrophosphate amidotransferase | 5471 | 0.011818684 | 1.215318172 |
| 51651_at | PTRH2 | peptidyl-tRNA hydrolase 2 | 51651 | 0.008265403 | 1.213737677 |
| 10574_at | CCT7 | chaperonin containing TCP1, subunit 7 (eta) | 10574 | 0.014516458 | 1.212642458 |
| 9601_at | PDIA4 | protein disulfide isomerase family A, member 4 | 9601 | 0.044837112 | 1.20989984 |
| 10203_at | CALCRL | calcitonin receptor-like | 10203 | 0.049111294 | 1.209757248 |
| 6785_at | ELOVL4 | ELOVL fatty acid elongase 4 | 6785 | 0.020633205 | 1.207702777 |
| 65122_at | PRAMEF2 | PRAME family member 2 | 65122 | 0.020128985 | 1.207536135 |
| 440307_at | TTLL13 | tubulin tyrosine ligase-like family, member 13 | 440307 | 0.017358711 | 1.207477737 |
| 81605_at | URM1 | ubiquitin related modifier 1 | 81605 | 0.022205067 | 1.206815626 |
| 29092_at | LINC00339 | long intergenic non-protein coding RNA 339 | 29092 | 0.033572477 | 1.205953557 |
| 55253_at | TYW1 | tRNA-yW synthesizing protein 1 homolog (S. cerevisiae) | 55253 | 0.006029479 | 1.205356078 |
| 55614_at | KIF16B | kinesin family member 16B | 55614 | 0.013322368 | 1.203705946 |
| 1325_at | CORT | cortistatin | 1325 | 0.019017171 | 1.203237484 |
| 3329_at | HSPD1 | heat shock 60kDa protein 1 (chaperonin) | 3329 | 0.002420006 | 1.202438166 |
| 124404_at | set-12 | septin 12 | 124404 | 0.022789221 | 1.201224992 |
| 79026_at | AHNAK | AHNAK nucleoprotein | 79026 | 0.021061189 | 1.200627447 |
| 401296_at | LOC401296 | uncharacterized LOC401296 | 401296 | 0.028785305 | 1.198396269 |
| 10456_at | HAX1 | HCLS1 associated protein X-1 | 10456 | 0.039172609 | 1.197523624 |
| 8243_at | SMC1A | structural maintenance of chromosomes 1A | 8243 | 0.016111551 | 1.197461018 |
| 22880_at | MORC2 | MORC family CW-type zinc finger 2 | 22880 | 0.02259166 | 1.197111793 |
| 10544_at | PROCR | protein C receptor, endothelial | 10544 | 0.018649016 | 1.196977013 |
| 7464_at | CORO2A | coronin, actin binding protein, 2A | 7464 | 0.045850113 | 1.196402416 |
| 84365_at | MKI67IP | MKI67 (FHA domain) interacting nucleolar phosphoprotein | 84365 | 0.018630684 | 1.194755637 |
| 57447_at | NDRG2 | NDRG family member 2 | 57447 | 0.02139796 | 1.194054502 |
| 318_at | NUDT2 | nudix (nucleoside diphosphate linked moiety X)-type motif 2 | 318 | 0.021474452 | 1.193203775 |
| 1345_at | COX6C | cytochrome c oxidase subunit VIc | 1345 | 0.047208701 | 1.191307744 |
| 284402_at | SCGB2B2 | secretoglobin, family 2B, member 2 | 284402 | 0.002710497 | 1.191023156 |
| 56993_at | TOMM22 | translocase of outer mitochondrial membrane 22 homolog (yeast) | 56993 | 0.027892549 | 1.189957722 |
| 28973_at | MRPS18B | mitochondrial ribosomal protein S18B | 28973 | 0.038351594 | 1.188552093 |
| 57089_at | ENTPD7 | ectonucleoside triphosphate diphosphohydrolase 7 | 57089 | 0.003262088 | 1.188156124 |
| 80740_at | LY6G6C | lymphocyte antigen 6 complex, locus G6C | 80740 | 0.026213197 | 1.188099088 |
| 26025_at | PCDHGA12 | protocadherin gamma subfamily A, 12 | 26025 | 0.007261321 | 1.187243803 |
| 64969_at | MRPS5 | mitochondrial ribosomal protein S5 | 64969 | 0.003183508 | 1.186983027 |
| 375940_at | FLJ46361 | deleted in malignant brain tumors 1 pseudogene | 375940 | 0.029344501 | 1.18681776 |
| 60528_at | ELAC2 | elaC homolog 2 (E. coli) | 60528 | 0.005969101 | 1.184813899 |
| 6297_at | SALL2 | sal-like 2 (Drosophila) | 6297 | 0.002436369 | 1.184154773 |
| 26249_at | KLHL3 | kelch-like 3 (Drosophila) | 26249 | 0.016070901 | 1.184062128 |
| 399821_at | FLJ37035 | uncharacterized LOC399821 | 399821 | 0.001883596 | 1.181222316 |
| 23065_at | EMC1 | ER membrane protein complex subunit 1 | 23065 | 0.007391551 | 1.180127958 |
| 26766_at | RNU105C | RNA, U105C small nucleolar | 26766 | 0.034066993 | 1.179484034 |
| 10752_at | CHL1 | cell adhesion molecule with homology to L1CAM (close homolog of L1) | 10752 | 0.008295986 | 1.179336612 |
| 3183_at | HNRNPC | heterogeneous nuclear ribonucleoprotein C (C1/C2) | 3183 | 0.042271991 | 1.178707385 |
| 155066_at | ATP6V0E2 | ATPase, H+ transporting V0 subunit e2 | 155066 | 0.027108034 | 1.178111125 |
| 51477_at | ISYNA1 | inositol-3-phosphate synthase 1 | 51477 | 0.024540245 | 1.177982615 |
| 63917_at | GALNT11 | UDP-N-acetyl-alpha-D-galactosamine:polypeptide N-acetylgalactosaminyltransferase 11 (GalNAc-T11) | 63917 | 0.035476755 | 1.177807396 |
| 126070_at | ZNF440 | zinc finger protein 440 | 126070 | 0.005887393 | 1.177173672 |
| 11325_at | DDX42 | DEAD (Asp-Glu-Ala-Asp) box polypeptide 42 | 11325 | 0.022344309 | 1.177085619 |
| 57678_at | GPAM | glycerol-3-phosphate acyltransferase, mitochondrial | 57678 | 0.021150704 | 1.177046385 |
| 54765_at | TRIM44 | tripartite motif containing 44 | 54765 | 0.033111822 | 1.176476485 |
| 4744_at | NEFH | neurofilament, heavy polypeptide | 4744 | 0.001561969 | 1.176392314 |
| 3313_at | HSPA9 | heat shock 70kDa protein 9 (mortalin) | 3313 | 0.009970967 | 1.175839075 |
| 26227_at | PHGDH | phosphoglycerate dehydrogenase | 26227 | 0.038610041 | 1.175427156 |
| 112812_at | FDX1L | ferredoxin 1-like | 112812 | 0.040856733 | 1.175368151 |
| 56937_at | PMEPA1 | prostate transmembrane protein, androgen induced 1 | 56937 | 0.042919278 | 1.1740931 |
| 8673_at | VAMP8 | vesicle-associated membrane protein 8 (endobrevin) | 8673 | 0.006542202 | 1.173801199 |
| 50937_at | CDON | Cdon homolog (mouse) | 50937 | 0.007141664 | 1.173404397 |
| 1999_at | ELF3 | E74-like factor 3 (ets domain transcription factor, epithelial-specific ) | 1999 | 0.047424266 | 1.17332503 |
| 6166_at | RPL36AL | ribosomal protein L36a-like | 6166 | 0.043441011 | 1.173266694 |
| 84274_at | COQ5 | coenzyme Q5 homolog, methyltransferase (S. cerevisiae) | 84274 | 0.029852511 | 1.17315036 |
| 1942_at | EFNA1 | ephrin-A1 | 1942 | 0.008507887 | 1.173079171 |
| 6822_at | SULT2A1 | sulfotransferase family, cytosolic, 2A, dehydroepiandrosterone (DHEA)-preferring, member 1 | 6822 | 0.017576448 | 1.172935863 |
| 26223_at | FBXL21 | F-box and leucine-rich repeat protein 21 (gene/pseudogene) | 26223 | 0.047296808 | 1.171517496 |
| 5629_at | PROX1 | prospero homeobox 1 | 5629 | 0.048080391 | 1.171504652 |
| 26146_at | TRAF3IP1 | TNF receptor-associated factor 3 interacting protein 1 | 26146 | 0.008321911 | 1.170452535 |
| 54865_at | GPATCH4 | G patch domain containing 4 | 54865 | 0.040200169 | 1.169676878 |
| 4714_at | NDUFB8 | NADH dehydrogenase (ubiquinone) 1 beta subcomplex, 8, 19kDa | 4714 | 0.023206582 | 1.169325079 |
| 28_at | ABO | ABO blood group (transferase A, alpha 1-3-N-acetylgalactosaminyltransferase; transferase B, alpha 1-3-galactosyltransferase) | 28 | 0.010833752 | 1.168511904 |
| 114801_at | TMEM200A | transmembrane protein 200A | 114801 | 0.008195289 | 1.167270101 |
| 54567_at | DLL4 | delta-like 4 (Drosophila) | 54567 | 0.018045802 | 1.166903113 |
| 2014_at | EMP3 | epithelial membrane protein 3 | 2014 | 0.01411288 | 1.166901993 |
| 5680_at | PSG11 | pregnancy specific beta-1-glycoprotein 11 | 5680 | 0.029023493 | 1.166261578 |
| 9984_at | THOC1 | THO complex 1 | 9984 | 0.014665468 | 1.166172962 |
| 55145_at | THAP1 | THAP domain containing, apoptosis associated protein 1 | 55145 | 0.029823058 | 1.165959987 |
| 91574_at | C12orf65 | chromosome 12 open reading frame 65 | 91574 | 0.022665799 | 1.165878125 |
| 140947_at | C5orf20 | chromosome 5 open reading frame 20 | 140947 | 0.049049489 | 1.165876184 |
| 4869_at | NPM1 | nucleophosmin (nucleolar phosphoprotein B23, numatrin) | 4869 | 0.04986424 | 1.165710209 |
| 9410_at | SNRNP40 | small nuclear ribonucleoprotein 40kDa (U5) | 9410 | 0.049868128 | 1.165645963 |
| 23450_at | SF3B3 | splicing factor 3b, subunit 3, 130kDa | 23450 | 0.026311149 | 1.165570604 |
| 677836_at | SNORA58 | small nucleolar RNA, H/ACA box 58 | 677836 | 0.029094514 | 1.165301333 |
| 57463_at | AMIGO1 | adhesion molecule with Ig-like domain 1 | 57463 | 0.022699018 | 1.164531886 |
| 4258_at | MGST2 | microsomal glutathione S-transferase 2 | 4258 | 0.041854558 | 1.164418186 |
| 6711_at | SPTBN1 | spectrin, beta, non-erythrocytic 1 | 6711 | 0.045464551 | 1.163904271 |
| 8992_at | ATP6V0E1 | ATPase, H+ transporting, lysosomal 9kDa, V0 subunit e1 | 8992 | 0.010529812 | 1.163741826 |
| 83538_at | TTC25 | tetratricopeptide repeat domain 25 | 83538 | 0.019365574 | 1.163342439 |
| 8550_at | MAPKAPK5 | mitogen-activated protein kinase-activated protein kinase 5 | 8550 | 0.005458906 | 1.162765894 |
| 6623_at | SNCG | synuclein, gamma (breast cancer-specific protein 1) | 6623 | 0.011889065 | 1.162477192 |
| 5152_at | PDE9A | phosphodiesterase 9A | 5152 | 0.018980232 | 1.161991016 |
| 10055_at | SAE1 | SUMO1 activating enzyme subunit 1 | 10055 | 0.030665896 | 1.161426008 |
| 51275_at | MAPKAPK5-AS1 | MAPKAPK5 antisense RNA 1 | 51275 | 0.025524032 | 1.161116986 |
| 2978_at | GUCA1A | guanylate cyclase activator 1A (retina) | 2978 | 0.044223873 | 1.159670006 |
| 326625_at | MMAB | methylmalonic aciduria (cobalamin deficiency) cblB type | 326625 | 0.013991997 | 1.159142667 |
| 8082_at | SSPN | sarcospan | 8082 | 0.000919053 | 1.158995537 |
| 8857_at | FCGBP | Fc fragment of IgG binding protein | 8857 | 0.022735117 | 1.158647677 |
| 390067_at | OR52H1 | olfactory receptor, family 52, subfamily H, member 1 | 390067 | 0.049748647 | 1.158595831 |
| 23060_at | ZNF609 | zinc finger protein 609 | 23060 | 0.023413896 | 1.158522691 |
| 5962_at | RDX | radixin | 5962 | 0.046283853 | 1.157940572 |
| 406945_at | MIR153-2 | microRNA 153-2 | 406945 | 0.008055433 | 1.157874708 |
| 150684_at | COMMD1 | copper metabolism (Murr1) domain containing 1 | 150684 | 0.016663567 | 1.157400425 |
| 79710_at | MORC4 | MORC family CW-type zinc finger 4 | 79710 | 0.033715058 | 1.156396098 |
| 127343_at | DMBX1 | diencephalon/mesencephalon homeobox 1 | 127343 | 0.023210717 | 1.155996516 |
| 23358_at | USP24 | ubiquitin specific peptidase 24 | 23358 | 0.028532334 | 1.155913189 |
| 57462_at | KIAA1161 | KIAA1161 | 57462 | 0.016180813 | 1.155225798 |
| 7137_at | TNNI3 | troponin I type 3 (cardiac) | 7137 | 0.044473803 | 1.154832923 |
| 51645_at | PPIL1 | peptidylprolyl isomerase (cyclophilin)-like 1 | 51645 | 0.034425509 | 1.15428743 |
| 220070_at | SHANK2-AS3 | SHANK2 antisense RNA 3 | 220070 | 0.027267586 | 1.154132011 |
| 119682_at | OR51L1 | olfactory receptor, family 51, subfamily L, member 1 | 119682 | 0.037924937 | 1.153261039 |
| 10898_at | CPSF4 | cleavage and polyadenylation specific factor 4, 30kDa | 10898 | 0.005550403 | 1.152937509 |
| 4670_at | HNRNPM | heterogeneous nuclear ribonucleoprotein M | 4670 | 0.012700516 | 1.152322674 |
| 26011_at | ODZ4 | odz, odd Oz/ten-m homolog 4 (Drosophila) | 26011 | 0.019880536 | 1.151818106 |
| 3074_at | HEXB | hexosaminidase B (beta polypeptide) | 3074 | 0.03309378 | 1.151288252 |
| 91801_at | ALKBH8 | alkB, alkylation repair homolog 8 (E. coli) | 91801 | 0.04592147 | 1.151187059 |
| 1369_at | CPN1 | carboxypeptidase N, polypeptide 1 | 1369 | 0.034504798 | 1.151161368 |
| 27166_at | PRELID1 | PRELI domain containing 1 | 27166 | 0.043920859 | 1.150743741 |
| 8831_at | SYNGAP1 | synaptic Ras GTPase activating protein 1 | 8831 | 0.040975121 | 1.150619296 |
| 27185_at | DISC1 | disrupted in schizophrenia 1 | 27185 | 0.028000785 | 1.150352234 |
| 124808_at | CCDC43 | coiled-coil domain containing 43 | 124808 | 0.021925019 | 1.150206302 |
| 79613_at | TMCO7 | transmembrane and coiled-coil domains 7 | 79613 | 0.023030434 | 1.1501897 |
| 5025_at | P2RX4 | purinergic receptor P2X, ligand-gated ion channel, 4 | 5025 | 0.045972719 | 1.150172653 |
| 128872_at | HMGB3P1 | high mobility group box 3 pseudogene 1 | 128872 | 0.049967471 | 1.150104416 |
| 2079_at | ERH | enhancer of rudimentary homolog (Drosophila) | 2079 | 0.028480062 | 1.149871335 |
| 605_at | BCL7A | B-cell CLL/lymphoma 7A | 605 | 0.006079479 | 1.149834434 |
| 7342_at | UBP1 | upstream binding protein 1 (LBP-1a) | 7342 | 0.002394379 | 1.148575161 |
| 57733_at | GBA3 | glucosidase, beta, acid 3 (cytosolic) | 57733 | 0.009529435 | 1.14844272 |
| 246329_at | STAC3 | SH3 and cysteine rich domain 3 | 246329 | 0.0134609 | 1.148422656 |
| 10961_at | ERP29 | endoplasmic reticulum protein 29 | 10961 | 0.043619152 | 1.148407588 |
| 6897_at | TARS | threonyl-tRNA synthetase | 6897 | 0.014993899 | 1.1474942 |
| 56995_at | TULP4 | tubby like protein 4 | 56995 | 0.047519533 | 1.147319431 |
| 55530_at | SVOP | SV2 related protein homolog (rat) | 55530 | 0.001601918 | 1.147253259 |
| 1936_at | EEF1D | eukaryotic translation elongation factor 1 delta (guanine nucleotide exchange protein) | 1936 | 0.021136933 | 1.147039298 |
| 51068_at | NMD3 | NMD3 homolog (S. cerevisiae) | 51068 | 0.012157221 | 1.147007929 |
| 51264_at | MRPL27 | mitochondrial ribosomal protein L27 | 51264 | 0.007654074 | 1.146752748 |
| 4790_at | NFKB1 | nuclear factor of kappa light polypeptide gene enhancer in B-cells 1 | 4790 | 0.021982885 | 1.14606106 |
| 554210_at | MIR429 | microRNA 429 | 554210 | 0.026301663 | 1.145854042 |
| 112703_at | FAM71E1 | family with sequence similarity 71, member E1 | 112703 | 0.043193947 | 1.145690824 |
| 89857_at | KLHL6 | kelch-like 6 (Drosophila) | 89857 | 0.034780985 | 1.145575061 |
| 5713_at | PSMD7 | proteasome (prosome, macropain) 26S subunit, non-ATPase, 7 | 5713 | 0.003796332 | 1.144702041 |
| 23261_at | CAMTA1 | calmodulin binding transcription activator 1 | 23261 | 0.047621261 | 1.144617639 |
| 91603_at | ZNF830 | zinc finger protein 830 | 91603 | 0.03988914 | 1.144575397 |
| 84181_at | CHD6 | chromodomain helicase DNA binding protein 6 | 84181 | 0.025414091 | 1.14398969 |
| 79080_at | CCDC86 | coiled-coil domain containing 86 | 79080 | 0.015016409 | 1.143772393 |
| 549_at | AUH | AU RNA binding protein/enoyl-CoA hydratase | 549 | 0.042221242 | 1.143753749 |
| 22902_at | RUFY3 | RUN and FYVE domain containing 3 | 22902 | 0.045552572 | 1.143527773 |
| 5570_at | PKIB | protein kinase (cAMP-dependent, catalytic) inhibitor beta | 5570 | 0.023609367 | 1.143463716 |
| 866_at | SERPINA6 | serpin peptidase inhibitor, clade A (alpha-1 antiproteinase, antitrypsin), member 6 | 866 | 0.010758044 | 1.143352477 |
| 9128_at | PRPF4 | PRP4 pre-mRNA processing factor 4 homolog (yeast) | 9128 | 0.035364877 | 1.143084766 |
| 27345_at | KCNMB4 | potassium large conductance calcium-activated channel, subfamily M, beta member 4 | 27345 | 0.042653201 | 1.142886999 |
| 10795_at | ZNF268 | zinc finger protein 268 | 10795 | 0.036046665 | 1.142491856 |
| 55759_at | WDR12 | WD repeat domain 12 | 55759 | 0.044038057 | 1.142160125 |
| 824_at | CAPN2 | calpain 2, (m/II) large subunit | 824 | 0.021572446 | 1.14204408 |
| 11346_at | SYNPO | synaptopodin | 11346 | 0.030134843 | 1.142008316 |
| 378884_at | NHLRC1 | NHL repeat containing 1 | 378884 | 0.036050633 | 1.141661548 |
| 5357_at | PLS1 | plastin 1 | 5357 | 0.009490447 | 1.140950175 |
| 337878_at | KRTAP7-1 | keratin associated protein 7-1 (gene/pseudogene) | 337878 | 0.016685604 | 1.140660004 |
| 3213_at | HOXB3 | homeobox B3 | 3213 | 0.016881055 | 1.140379757 |
| 79979_at | TRMT2B | tRNA methyltransferase 2 homolog B (S. cerevisiae) | 79979 | 0.04201794 | 1.140016239 |
| 80196_at | RNF34 | ring finger protein 34, E3 ubiquitin protein ligase | 80196 | 0.016637708 | 1.140002616 |
| 347541_at | MAGEB5 | melanoma antigen family B, 5 | 347541 | 0.041612813 | 1.139981471 |
| 7621_at | ZNF70 | zinc finger protein 70 | 7621 | 0.035126366 | 1.13997013 |
| 6185_at | RPN2 | ribophorin II | 6185 | 0.020237206 | 1.139430458 |
| 8435_at | SOAT2 | sterol O-acyltransferase 2 | 8435 | 0.043016441 | 1.139086978 |
| 158521_at | FMR1NB | fragile X mental retardation 1 neighbor | 158521 | 0.046793946 | 1.13893487 |
| 6160_at | RPL31 | ribosomal protein L31 | 6160 | 0.049215073 | 1.138849544 |
| 339263_at | C17orf51 | chromosome 17 open reading frame 51 | 339263 | 0.036723444 | 1.13851933 |
| 135154_at | C6orf57 | chromosome 6 open reading frame 57 | 135154 | 0.040480143 | 1.138365382 |
| 5167_at | ENPP1 | ectonucleotide pyrophosphatase/phosphodiesterase 1 | 5167 | 0.034846276 | 1.137804443 |
| 667_at | DST | dystonin | 667 | 0.046993621 | 1.137782879 |
| 23321_at | TRIM2 | tripartite motif containing 2 | 23321 | 0.048009744 | 1.137782581 |
| 55112_at | WDR60 | WD repeat domain 60 | 55112 | 0.021558158 | 1.136697517 |
| 26608_at | TBL2 | transducin (beta)-like 2 | 26608 | 0.025326987 | 1.136695032 |
| 64175_at | LEPRE1 | leucine proline-enriched proteoglycan (leprecan) 1 | 64175 | 0.019740969 | 1.136690141 |
| 10418_at | SPON1 | spondin 1, extracellular matrix protein | 10418 | 0.034755039 | 1.136112409 |
| 2132_at | EXT2 | exostosin 2 | 2132 | 0.044601105 | 1.135850117 |
| 57092_at | PCNP | PEST proteolytic signal containing nuclear protein | 57092 | 0.001288484 | 1.13571927 |
| 171024_at | SYNPO2 | synaptopodin 2 | 171024 | 0.039375032 | 1.134863024 |
| 51067_at | YARS2 | tyrosyl-tRNA synthetase 2, mitochondrial | 51067 | 0.02291826 | 1.134813919 |
| 80342_at | TRAF3IP3 | TRAF3 interacting protein 3 | 80342 | 0.033452405 | 1.134753356 |
| 10579_at | TACC2 | transforming, acidic coiled-coil containing protein 2 | 10579 | 0.024789994 | 1.134408488 |
| 127254_at | C1orf173 | chromosome 1 open reading frame 173 | 127254 | 0.010666854 | 1.134405557 |
| 26240_at | FAM50B | family with sequence similarity 50, member B | 26240 | 0.042615384 | 1.134396636 |
| 4661_at | MYT1 | myelin transcription factor 1 | 4661 | 0.035908135 | 1.134253451 |
| 201266_at | SLC39A11 | solute carrier family 39 (metal ion transporter), member 11 | 201266 | 0.048989793 | 1.134212507 |
| 4216_at | MAP3K4 | mitogen-activated protein kinase kinase kinase 4 | 4216 | 0.012557238 | 1.133969242 |
| 399671_at | HEATR4 | HEAT repeat containing 4 | 399671 | 0.02761136 | 1.133863243 |
| 55036_at | CCDC40 | coiled-coil domain containing 40 | 55036 | 0.014898794 | 1.133599504 |
| 1778_at | DYNC1H1 | dynein, cytoplasmic 1, heavy chain 1 | 1778 | 0.031098413 | 1.13339252 |
| 221061_at | FAM171A1 | family with sequence similarity 171, member A1 | 221061 | 0.015600036 | 1.133179456 |
| 148206_at | ZNF714 | zinc finger protein 714 | 148206 | 0.031900342 | 1.132969395 |
| 375387_at | LRRC33 | leucine rich repeat containing 33 | 375387 | 0.047331538 | 1.132624398 |
| 9326_at | ZNHIT3 | zinc finger, HIT-type containing 3 | 9326 | 0.037455908 | 1.13218348 |
| 29999_at | FSCN3 | fascin homolog 3, actin-bundling protein, testicular (Strongylocentrotus purpuratus) | 29999 | 0.039921307 | 1.132129024 |
| 7552_at | ZNF711 | zinc finger protein 711 | 7552 | 0.035190871 | 1.131861463 |
| 4795_at | NFKBIL1 | nuclear factor of kappa light polypeptide gene enhancer in B-cells inhibitor-like 1 | 4795 | 0.011097185 | 1.131149633 |
| 167359_at | NIM1 | serine/threonine-protein kinase NIM1 | 167359 | 0.036952608 | 1.129603861 |
| 26333_at | OR7A17 | olfactory receptor, family 7, subfamily A, member 17 | 26333 | 0.038342595 | 1.129509665 |
| 122622_at | ADSSL1 | adenylosuccinate synthase like 1 | 122622 | 0.004089346 | 1.129420425 |
| 10954_at | PDIA5 | protein disulfide isomerase family A, member 5 | 10954 | 0.045443941 | 1.129032955 |
| 1937_at | EEF1G | eukaryotic translation elongation factor 1 gamma | 1937 | 0.021931634 | 1.128611518 |
| 84239_at | ATP13A4 | ATPase type 13A4 | 84239 | 0.023560674 | 1.128374059 |
| 7266_at | DNAJC7 | DnaJ (Hsp40) homolog, subfamily C, member 7 | 7266 | 0.031697016 | 1.128325233 |
| 55190_at | NUDT11 | nudix (nucleoside diphosphate linked moiety X)-type motif 11 | 55190 | 0.018765831 | 1.128143966 |
| 57573_at | ZNF471 | zinc finger protein 471 | 57573 | 0.040487417 | 1.127909095 |
| 1947_at | EFNB1 | ephrin-B1 | 1947 | 0.01924703 | 1.127879128 |
| 6230_at | RPS25 | ribosomal protein S25 | 6230 | 0.034872416 | 1.127840856 |
| 27330_at | RPS6KA6 | ribosomal protein S6 kinase, 90kDa, polypeptide 6 | 27330 | 0.043584183 | 1.127447963 |
| 619556_at | MIR455 | microRNA 455 | 619556 | 0.037308942 | 1.127443664 |
| 121391_at | KRT74 | keratin 74 | 121391 | 0.041492511 | 1.127422833 |
| 100128977_at | MAPT-AS1 | MAPT antisense RNA 1 | 100128977 | 0.006554233 | 1.126772498 |
| 58478_at | ENOPH1 | enolase-phosphatase 1 | 58478 | 0.036284355 | 1.125876002 |
| 509_at | ATP5C1 | ATP synthase, H+ transporting, mitochondrial F1 complex, gamma polypeptide 1 | 509 | 0.019095062 | 1.125792588 |
| 26074_at | C20orf26 | chromosome 20 open reading frame 26 | 26074 | 0.006389718 | 1.125359167 |
| 23741_at | EID1 | EP300 interacting inhibitor of differentiation 1 | 23741 | 0.045711137 | 1.125061332 |
| 50853_at | VILL | villin-like | 50853 | 0.035719595 | 1.12452616 |
| 10480_at | EIF3M | eukaryotic translation initiation factor 3, subunit M | 10480 | 0.035079197 | 1.124323791 |
| 440435_at | GPR179 | G protein-coupled receptor 179 | 440435 | 0.04454316 | 1.123991338 |
| 92129_at | RIPPLY1 | ripply1 homolog (zebrafish) | 92129 | 0.03260454 | 1.123964619 |
| 5042_at | PABPC3 | poly(A) binding protein, cytoplasmic 3 | 5042 | 0.017128157 | 1.123523931 |
| 6434_at | TRA2B | transformer 2 beta homolog (Drosophila) | 6434 | 0.011168737 | 1.122742581 |
| 2104_at | ESRRG | estrogen-related receptor gamma | 2104 | 0.038791809 | 1.122518769 |
| 145946_at | SPATA8 | spermatogenesis associated 8 | 145946 | 0.041388141 | 1.122469343 |
| 154091_at | SLC2A12 | solute carrier family 2 (facilitated glucose transporter), member 12 | 154091 | 0.00922818 | 1.12240205 |
| 2199_at | FBLN2 | fibulin 2 | 2199 | 0.026858612 | 1.121820477 |
| 79004_at | CUEDC2 | CUE domain containing 2 | 79004 | 0.046120119 | 1.121763154 |
| 7466_at | WFS1 | Wolfram syndrome 1 (wolframin) | 7466 | 0.014172978 | 1.121111206 |
| 25894_at | PLEKHG4 | pleckstrin homology domain containing, family G (with RhoGef domain) member 4 | 25894 | 0.034849063 | 1.121005209 |
| 25928_at | SOSTDC1 | sclerostin domain containing 1 | 25928 | 0.024179186 | 1.120790516 |
| 3758_at | KCNJ1 | potassium inwardly-rectifying channel, subfamily J, member 1 | 3758 | 0.036679054 | 1.120701072 |
| 114915_at | EPB41L4A-AS1 | EPB41L4A antisense RNA 1 | 114915 | 0.038769299 | 1.120287649 |
| 476_at | ATP1A1 | ATPase, Na+/K+ transporting, alpha 1 polypeptide | 476 | 0.014786567 | 1.119860005 |
| 5411_at | PNN | pinin, desmosome associated protein | 5411 | 0.022457595 | 1.119756169 |
| 6167_at | RPL37 | ribosomal protein L37 | 6167 | 0.00744362 | 1.119418026 |
| 10131_at | TRAP1 | TNF receptor-associated protein 1 | 10131 | 0.032212177 | 1.119306179 |
| 163059_at | ZNF433 | zinc finger protein 433 | 163059 | 0.026652744 | 1.119046937 |
| 146556_at | C16orf89 | chromosome 16 open reading frame 89 | 146556 | 0.03867028 | 1.118951008 |
| 4625_at | MYH7 | myosin, heavy chain 7, cardiac muscle, beta | 4625 | 0.039983388 | 1.118802551 |
| 55964_at | set-03 | septin 3 | 55964 | 0.018315872 | 1.1180548 |
| 64434_at | NOM1 | nucleolar protein with MIF4G domain 1 | 64434 | 0.029738187 | 1.117662404 |
| 51661_at | FKBP7 | FK506 binding protein 7 | 51661 | 0.038032931 | 1.117505622 |
| 136051_at | ZNF786 | zinc finger protein 786 | 136051 | 0.02359581 | 1.116940736 |
| 5511_at | PPP1R8 | protein phosphatase 1, regulatory subunit 8 | 5511 | 0.048067377 | 1.116350567 |
| 126074_at | SWSAP1 | SWIM-type zinc finger 7 associated protein 1 | 126074 | 0.041299902 | 1.116335758 |
| 7024_at | TFCP2 | transcription factor CP2 | 7024 | 0.035588719 | 1.116192607 |
| 284573_at | LINC00303 | long intergenic non-protein coding RNA 303 | 284573 | 0.049085506 | 1.115604303 |
| 246213_at | SLC17A8 | solute carrier family 17 (sodium-dependent inorganic phosphate cotransporter), member 8 | 246213 | 0.019409294 | 1.114613265 |
| 60412_at | EXOC4 | exocyst complex component 4 | 60412 | 0.012252725 | 1.113988625 |
| 8706_at | B3GALNT1 | beta-1,3-N-acetylgalactosaminyltransferase 1 (globoside blood group) | 8706 | 0.028050234 | 1.113806542 |
| 9552_at | SPAG7 | sperm associated antigen 7 | 9552 | 0.024747874 | 1.112605419 |
| 374897_at | SBSN | suprabasin | 374897 | 0.041316659 | 1.11236967 |
| 3543_at | IGLL1 | immunoglobulin lambda-like polypeptide 1 | 3543 | 0.045801217 | 1.112123327 |
| 390199_at | OR4D9 | olfactory receptor, family 4, subfamily D, member 9 | 390199 | 0.016554132 | 1.111978126 |
| 10330_at | CNPY2 | canopy 2 homolog (zebrafish) | 10330 | 0.018460209 | 1.111921915 |
| 92292_at | GLYATL1 | glycine-N-acyltransferase-like 1 | 92292 | 0.026041394 | 1.111646671 |
| 286676_at | ILDR1 | immunoglobulin-like domain containing receptor 1 | 286676 | 0.033320502 | 1.111139106 |
| 9325_at | TRIP4 | thyroid hormone receptor interactor 4 | 9325 | 0.030825242 | 1.11079554 |
| 6553_at | SLC9A5 | solute carrier family 9, subfamily A (NHE5, cation proton antiporter 5), member 5 | 6553 | 0.043659947 | 1.110762922 |
| 153684_at | LOC153684 | uncharacterized LOC153684 | 153684 | 0.036322149 | 1.110583967 |
| 59082_at | CARD18 | caspase recruitment domain family, member 18 | 59082 | 0.038384578 | 1.110476452 |
| 6520_at | SLC3A2 | solute carrier family 3 (activators of dibasic and neutral amino acid transport), member 2 | 6520 | 0.029445356 | 1.109155994 |
| 26256_at | CABYR | calcium binding tyrosine-(Y)-phosphorylation regulated | 26256 | 0.010840136 | 1.1089897 |
| 27_at | ABL2 | v-abl Abelson murine leukemia viral oncogene homolog 2 | 27 | 0.036480396 | 1.108898818 |
| 6949_at | TCOF1 | Treacher Collins-Franceschetti syndrome 1 | 6949 | 0.028642574 | 1.108693844 |
| 51126_at | NAA20 | N(alpha)-acetyltransferase 20, NatB catalytic subunit | 51126 | 0.021607571 | 1.107377768 |
| 55089_at | SLC38A4 | solute carrier family 38, member 4 | 55089 | 0.015384986 | 1.107285679 |
| 9371_at | KIF3B | kinesin family member 3B | 9371 | 0.02732807 | 1.106546936 |
| 2734_at | GLG1 | golgi glycoprotein 1 | 2734 | 0.047193596 | 1.105695849 |
| 735_at | C9 | complement component 9 | 735 | 0.045053427 | 1.105564189 |
| 85461_at | TANC1 | tetratricopeptide repeat, ankyrin repeat and coiled-coil containing 1 | 85461 | 0.040281755 | 1.104736899 |
| 200931_at | SLC51A | solute carrier family 51, alpha subunit | 200931 | 0.018669662 | 1.104493134 |
| 283638_at | KIAA0284 | KIAA0284 | 283638 | 0.048656311 | 1.10354491 |
| 54749_at | EPDR1 | ependymin related protein 1 (zebrafish) | 54749 | 0.022339565 | 1.10296851 |
| 151525_at | WDSUB1 | WD repeat, sterile alpha motif and U-box domain containing 1 | 151525 | 0.04586212 | 1.102844628 |
| 3174_at | HNF4G | hepatocyte nuclear factor 4, gamma | 3174 | 0.025486351 | 1.102758698 |
| 8823_at | FGF16 | fibroblast growth factor 16 | 8823 | 0.011454592 | 1.102333115 |
| 55738_at | ARFGAP1 | ADP-ribosylation factor GTPase activating protein 1 | 55738 | 0.033854749 | 1.102273328 |
| 23283_at | CSTF2T | cleavage stimulation factor, 3' pre-RNA, subunit 2, 64kDa, tau variant | 23283 | 0.018314099 | 1.102192852 |
| 1757_at | SARDH | sarcosine dehydrogenase | 1757 | 0.049441334 | 1.10195898 |
| 6430_at | SRSF5 | serine/arginine-rich splicing factor 5 | 6430 | 0.04705331 | 1.101538295 |
| 390038_at | OR51D1 | olfactory receptor, family 51, subfamily D, member 1 | 390038 | 0.030784804 | 1.101404517 |
| 28974_at | C19orf53 | chromosome 19 open reading frame 53 | 28974 | 0.025600904 | 1.101273794 |
| 133522_at | PPARGC1B | peroxisome proliferator-activated receptor gamma, coactivator 1 beta | 133522 | 0.006899628 | 1.101183796 |
| 114781_at | BTBD9 | BTB (POZ) domain containing 9 | 114781 | 0.030775094 | 1.100922586 |
| 1327_at | COX4I1 | cytochrome c oxidase subunit IV isoform 1 | 1327 | 0.04410613 | 1.099580656 |
| 54221_at | SNTG2 | syntrophin, gamma 2 | 54221 | 0.036118093 | 1.099547138 |
| 127281_at | FAM213B | family with sequence similarity 213, member B | 127281 | 0.028715314 | 1.09919649 |
| 5297_at | PI4KA | phosphatidylinositol 4-kinase, catalytic, alpha | 5297 | 0.004910238 | 1.098516866 |
| 3339_at | HSPG2 | heparan sulfate proteoglycan 2 | 3339 | 0.049251009 | 1.097900129 |
| 9416_at | DDX23 | DEAD (Asp-Glu-Ala-Asp) box polypeptide 23 | 9416 | 0.01441687 | 1.097872646 |
| 219952_at | OR6Q1 | olfactory receptor, family 6, subfamily Q, member 1 | 219952 | 0.040036135 | 1.097657276 |
| 5143_at | PDE4C | phosphodiesterase 4C, cAMP-specific | 5143 | 0.048470626 | 1.096785117 |
| 80333_at | KCNIP4 | Kv channel interacting protein 4 | 80333 | 0.044786671 | 1.096063708 |
| 5864_at | RAB3A | RAB3A, member RAS oncogene family | 5864 | 0.044952907 | 1.09540846 |
| 10256_at | CNKSR1 | connector enhancer of kinase suppressor of Ras 1 | 10256 | 0.027708118 | 1.095320665 |
| 5499_at | PPP1CA | protein phosphatase 1, catalytic subunit, alpha isozyme | 5499 | 0.041071007 | 1.095286793 |
| 343641_at | TGM6 | transglutaminase 6 | 343641 | 0.045243008 | 1.095158178 |
| 10664_at | CTCF | CCCTC-binding factor (zinc finger protein) | 10664 | 0.035621267 | 1.095031351 |
| 57211_at | GPR126 | G protein-coupled receptor 126 | 57211 | 0.021091646 | 1.094963738 |
| 140711_at | C20orf118 | chromosome 20 open reading frame 118 | 140711 | 0.025658645 | 1.09483928 |
| 200895_at | DHFRL1 | dihydrofolate reductase-like 1 | 200895 | 0.031798019 | 1.094170647 |
| 260425_at | MAGI3 | membrane associated guanylate kinase, WW and PDZ domain containing 3 | 260425 | 0.0407396 | 1.093443287 |
| 353274_at | ZNF445 | zinc finger protein 445 | 353274 | 0.043698194 | 1.093235297 |
| 2782_at | GNB1 | guanine nucleotide binding protein (G protein), beta polypeptide 1 | 2782 | 0.003810547 | 1.093108175 |
| 7431_at | VIM | vimentin | 7431 | 0.028699983 | 1.092978718 |
| 51147_at | ING4 | inhibitor of growth family, member 4 | 51147 | 0.045791627 | 1.09277206 |
| 55329_at | MNS1 | meiosis-specific nuclear structural 1 | 55329 | 0.018478145 | 1.090040378 |
| 4915_at | NTRK2 | neurotrophic tyrosine kinase, receptor, type 2 | 4915 | 0.016452876 | 1.089660056 |
| 151325_at | MYADML | myeloid-associated differentiation marker-like (pseudogene) | 151325 | 0.048889055 | 1.089216607 |
| 26022_at | TMEM98 | transmembrane protein 98 | 26022 | 0.044894705 | 1.088571433 |
| 255101_at | CCDC108 | coiled-coil domain containing 108 | 255101 | 0.029543251 | 1.087932343 |
| 64395_at | GMCL1 | germ cell-less, spermatogenesis associated 1 | 64395 | 0.016144977 | 1.087691641 |
| 79955_at | PDZD7 | PDZ domain containing 7 | 79955 | 0.048126551 | 1.086891693 |
| 84189_at | SLITRK6 | SLIT and NTRK-like family, member 6 | 84189 | 0.044348911 | 1.086304648 |
| 143630_at | UBQLNL | ubiquilin-like | 143630 | 0.035644587 | 1.085640121 |
| 6746_at | SSR2 | signal sequence receptor, beta (translocon-associated protein beta) | 6746 | 0.033602319 | 1.084431011 |
| 8874_at | ARHGEF7 | Rho guanine nucleotide exchange factor (GEF) 7 | 8874 | 0.04311879 | 1.083708546 |
| 6549_at | SLC9A2 | solute carrier family 9, subfamily A (NHE2, cation proton antiporter 2), member 2 | 6549 | 0.040639804 | 1.08276919 |
| 138474_at | TAF1L | TAF1 RNA polymerase II, TATA box binding protein (TBP)-associated factor, 210kDa-like | 138474 | 0.049203672 | 1.082746073 |
| 57591_at | MKL1 | megakaryoblastic leukemia (translocation) 1 | 57591 | 0.033542887 | 1.079696331 |
| 9948_at | WDR1 | WD repeat domain 1 | 9948 | 0.014018262 | 1.078447251 |
| 3593_at | IL12B | interleukin 12B (natural killer cell stimulatory factor 2, cytotoxic lymphocyte maturation factor 2, p40) | 3593 | 0.044899131 | 1.076074332 |
| 4957_at | ODF2 | outer dense fiber of sperm tails 2 | 4957 | 0.046107197 | 1.070334434 |
| 51741_at | WWOX | WW domain containing oxidoreductase | 51741 | 0.020849258 | 1.07000049 |
| 23005_at | MAPKBP1 | mitogen-activated protein kinase binding protein 1 | 23005 | 0.045821936 | 1.064738151 |
| 3617_at | IMPG1 | interphotoreceptor matrix proteoglycan 1 | 3617 | 0.021018364 | 1.058731072 |
| 51802_at | ASIC5 | acid-sensing (proton-gated) ion channel family member 5 | 51802 | 0.042327036 | 1.05318866 |
| 80124_at | VCPIP1 | valosin containing protein (p97)/p47 complex interacting protein 1 | 80124 | 0.031679838 | 1.050042746 |
| 55573_at | CDV3 | CDV3 homolog (mouse) | 55573 | 0.036923822 | 1.049351383 |
